# Supplementary material for: Oxidation of olefins using molecular oxygen catalyzed by a part per million level of recyclable copper catalyst under mild conditions
Source: Royal Society of Chemistry journal article supplement (doi:10.1039/c6gc02186g), 2016-11-02

Electronic Supplementary Information For:

**Oxidation of olefins using molecular oxygen catalyzed by  
part-per-million level of recyclable copper catalyst under  
mild conditions**

Guoqiang Yang, Huiyuan Du, Jia Liu, Zheng Zhou, Xingbang Hu\*, Zhibing Zhang\*

*School of Chemistry and Chemical Engineering, Nanjing University, Nanjing 210093, PR  
China.*

**Index:**

1. Experimental methods
2. The influence of BHT for the oxidation
3. The results of different reaction conditions
4. The characterization results of the catalysts
5. The original NMR spectrum
6. The GC conditions for each of the substrates tested
7. The original GC-MS

## 1. Experimental methods

### 1.1 Materials and characterization methods

All solvents and chemicals were analytically pure agents purchased from commercial sources and were used without further purification unless otherwise indicated. The quantitative analysis of reactants and products was performed on a Shimadzu GC2014 gas chromatograph equipped with a WondaCAP-5 capillary column (5% Diphenyl 95% Dimethylpolysiloxane 30m×0.32mm×0.25µm) with a flame-ionization detector. A Shimadzu GCMS-QP2010 was used to identify substrates and their oxidation products resulting from catalysis. <sup>1</sup>H NMR and <sup>13</sup>C NMR spectra of ligands were recorded on a Bruker 400 MHz spectrometer. Ultraviolet-visible spectrum of different catalysts were recorded using a Shimadzu UV-3600 spectrophotometer (acetic acid as solvent). ESI Mass spectra of different catalysts were recorded using a Shimadzu LCMS-8030 ESI Mass Spectrometer.

### 1.2 General procedure for the synthesis of copper catalysts with an imidazole salt tag [Cu-Imace-R-H] [X] (X<sup>-</sup>=F<sup>-</sup>, Cl<sup>-</sup>, Br<sup>-</sup>, I<sup>-</sup>, CF<sub>3</sub>CO<sub>2</sub><sup>-</sup>, HSO<sub>4</sub><sup>-</sup>, NO<sub>3</sub><sup>-</sup>, PF<sub>6</sub><sup>-</sup>, or BF<sub>4</sub><sup>-</sup>; R=H or CH<sub>3</sub>)

The catalysts were synthesized according our previous procedures (ref. 49). In a typical experiment, 12.6 g (0.01 mol) 1-imidazoleacetic acid (Imace-H) was reacted with 11.0 g (0.11 mol) hydrochloric acid (36%) in 60 ml water at 50 °C for 3 h. The reaction mixture was evaporated under reduced pressure at 80 °C, and a white powder was obtained. Water was used to recrystallize the powder, and pure [Imace-H-H][Cl] was obtained. Subsequently, 14.6 g (0.090 mol) [Imace-H-H][Cl] was reacted with 8.9 g (0.045 mol) Cu(OAc)<sub>2</sub>•H<sub>2</sub>O in 100 ml water at 100 °C. The generated acetic acid was removed using water vapor. New amount of water (50 ml) was continuously added into the reaction system until the reaction was completed. The reaction mixture was then evaporated under reduced pressure at 80 °C, and a light-green

powder was obtained. Water was used to recrystallize the powder to obtain pure [Cu-Imace-H-H][Cl] (yield: 88.4%).

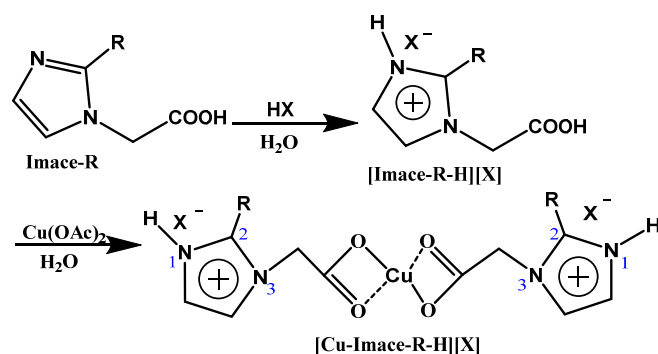

**Scheme S1** Generation method for preparing [Cu-Imace-R-H][X] ( $X^- = F^-, Cl^-, Br^-, I^-, CF_3CO_2^-, HSO_4^-, NO_3^-, PF_6^-,$  or  $BF_4^-$ ;  $R = H$  or  $CH_3$ )

### 1.3 Procedure for the synthesis of [Cu-Imace-H-CH<sub>3</sub>][I]

2.52g (0.02 mol) 1-imidazoleacetic acid (Imace-H) was reacted with 2.0 g (0.01 mol)  $Cu(OAc)_2 \cdot H_2O$  in 30 ml water at 100 °C. The generated acetic acid was removed using water vapor. New water was continuously added into the reaction system until the reaction was completed. The reaction mixture was then evaporated until the mixture left about 15mL under reduced pressure at 80 °C. The suspended mixture was cooled to room temperature. After filtration, the precipitate was washed repeatedly with water, and dried under vacuum at 60 °C. The pure Cu-Imace-H was obtained. Subsequently, 1.57g (0.005 mol) Cu-Imace-H was reacted with 1.7g (0.012 mol)  $CH_3I$  in 20 ml acetonitrile at 30 °C. The suspended mixture was stirred continuously for 24 h, then the reaction mixture was evaporated under reduced pressure at 50 °C, and a blue powder was obtained. Water was used to recrystallize the powder, and pure [Cu-Imace-H-CH<sub>3</sub>][I] was obtained. (Yield: 83.6%).

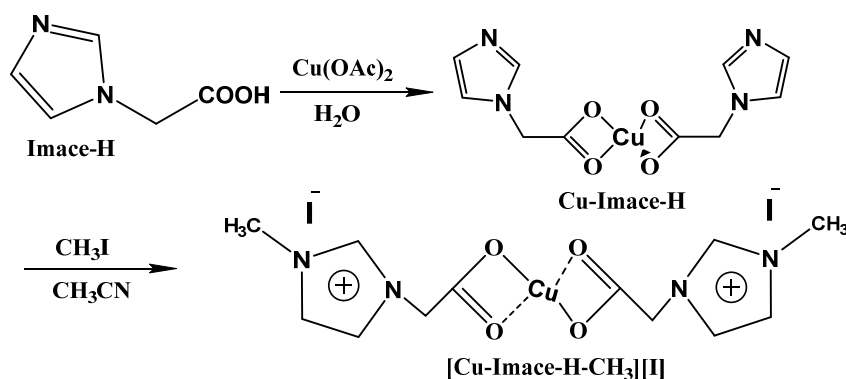

Scheme S2 Method for preparing  $[\text{Cu-Imace-H-CH}_3][\text{I}]$

#### 1.4 General procedure for cyclohexene epoxidation

The epoxidation reactions were carried out in tailored tubes equipped with a condensing unit ( $-30^\circ\text{C}$  ethanol as a cooling medium for the condensing to prevent the volatilization of solvent). Typically, 50 mL acetonitrile, 0.2 mol substrate, 0.2mol isobutylaldehyde and 0.08%mol (relative to the molar equivalent of substrate) catalysts were mixed with stirring at  $60^\circ\text{C}$ . Then, molecular oxygen ( $>99.0\%$ ) was bubbled through the solution and the reaction times were given in the tables or figures of the manuscript. o-dichlorobenzene was used as an internal standard for the determination of yield and selectivity. The filtered liquid samples were analyzed by GC and GC-MS.

#### 1.5 General procedure for catalyst recycling

The epoxidation reactions were carried out in tailored tubes equipped with a condensing unit ( $-30^\circ\text{C}$  ethanol as a cooling medium for the condensing to prevent the volatilization of solvent). 50 mL acetonitrile, 0.2 mol substrate, 0.2mol isobutylaldehyde and 0.08%mol (relative to the molar equivalent of substrate) catalysts were mixed with stirring at  $60^\circ\text{C}$ . Then, molecular oxygen ( $>99.0\%$ ) was bubbled through the solution. The catalyst can be performed by simple filtration after the completion of the reactions, the recycled catalyst was washed by

diethyl ether, then dried at 60 °C overnight. The reactions were performed under the same conditions using the recovered catalyst.

## 2. The influence of BHT for the oxidation

Procedure for cyclohexene epoxidation in the presence of BHT (3,5-di-tert-butyl-p-hydroxytoluene): The epoxidation reactions were carried out in tailored tubes equipped with a condensing unit (-30°C ethanol as a cooling medium for the condensing to prevent the volatilization of solvent). 50 mL acetonitrile, 0.2 mol substrate, 0.2mol isobutylaldehyde and 0.08%mol (relative to the molar equivalent of substrate) catalysts were mixed with stirring at 60 °C. Then, molecular oxygen (>99.0%) was bubbled through the solution. After 2 hours, 0.1g BHT was added into the catalytic system.

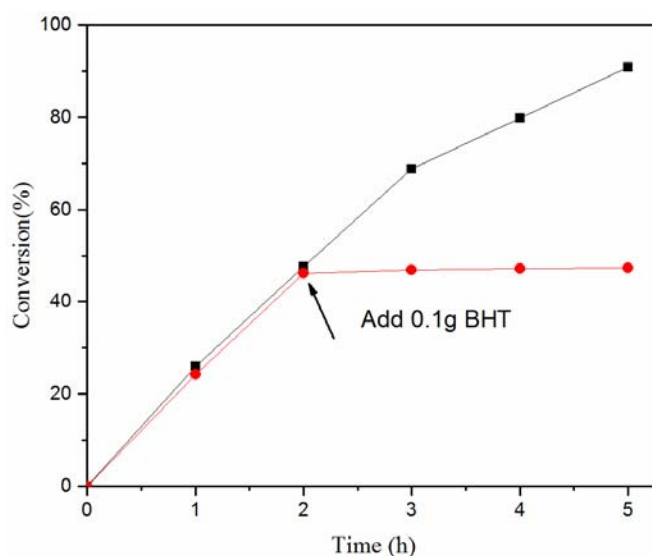

Fig. S1. The influence of BHT for the oxidation. Black line: normal reaction. Red line, 0.1g BHT was added after 2 hours.

## 3. The results of different reaction conditions

### 3.1 Reaction temperature

#### 3.1 Solvent

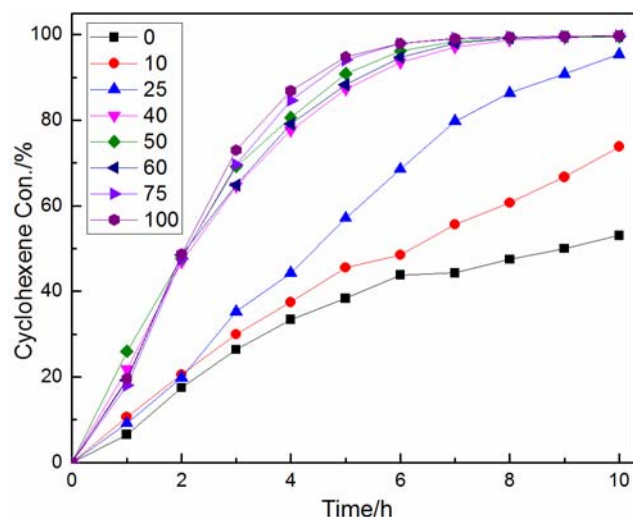

Fig. S2 Profile of the conversion rates of cyclohexene oxide for different amount of solvent (cyclohexene (0.2mol), solvent (CH<sub>3</sub>CN, mL), isobutyraldehyde (0.2mol), the catalyst-to-substrate molar ratio is 800ppm, 60 °C, O<sub>2</sub> bubbling (1atm). Products formed in the epoxidation reactions with olefins were identified by GC and GC-MS.)

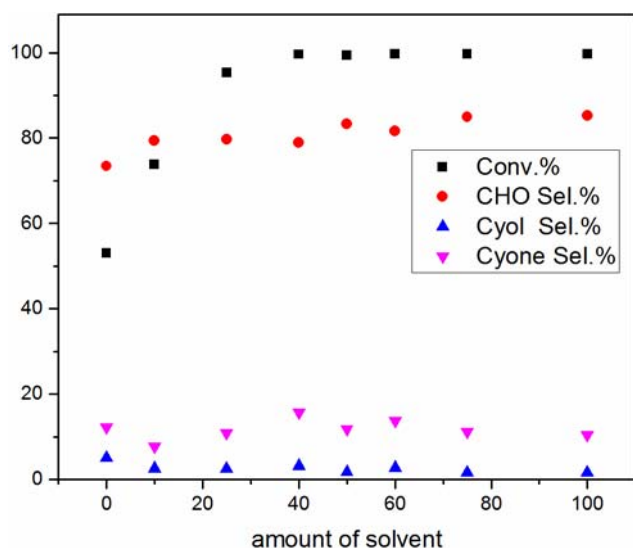

Fig. S3 The performance of loading different amount of solvent in the cyclohexene (cyclohexene (0.2mol), solvent (CH<sub>3</sub>CN, mL), isobutyraldehyde (0.2mol), the catalyst-to-substrate molar ratio is 800ppm, 60 °C, O<sub>2</sub> bubbling (1atm), 10h. Products formed in the epoxidation reactions with olefins were identified by GC and GC-MS.)

### 3.2 The molar ratio of isobutyraldehyde-to- cyclohexene

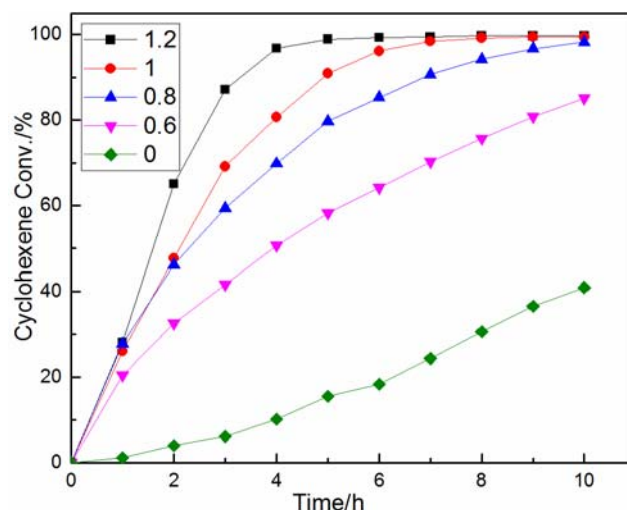

Fig. S4 Profile of the conversion rates of cyclohexene oxide for different molar ratios of isobutyraldehyde-to- cyclohexene (cyclohexene (0.2mol), solvent (CH<sub>3</sub>CN, 50mL), the molar ratio of isobutyraldehyde-to- cyclohexene is 0, 0.6, 0.8, 1, 1.2., the catalyst-to-substrate molar ratio is 800ppm, 60 °C, O<sub>2</sub> bubbling (1atm).Products formed in the epoxidation reactions with olefins were identified by GC and GC-MS.)

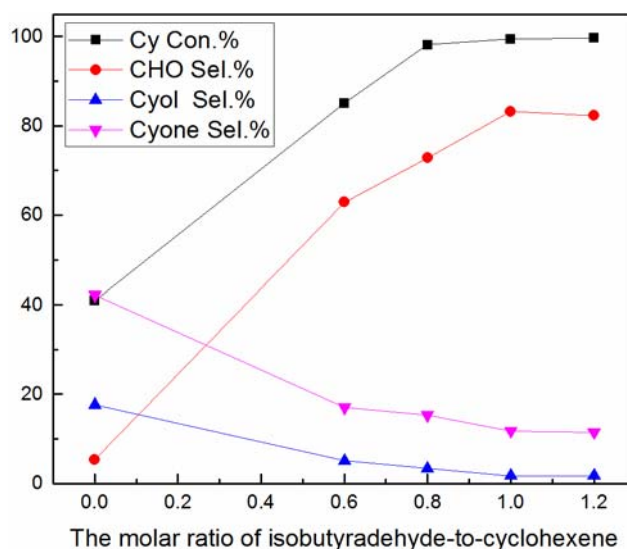

Fig. S5 The performance of different molar ratios of isobutyraldehyde-to- cyclohexene (cyclohexene (0.2mol), solvent (CH<sub>3</sub>CN, 50mL), the molar ratio of isobutyraldehyde-to- cyclohexene is 0, 0.6, 0.8, 1, 1.2., the catalyst-to-substrate molar ratio is 800ppm, 60 °C, O<sub>2</sub> bubbling (1atm),10h.Products formed in the epoxidation reactions with olefins were identified by GC and GC-MS.)

#### 4 The characterization results of the catalysts

[Imace-H-H][F]: <sup>1</sup>H-NMR (400MHz, D<sub>2</sub>O) δ (ppm) 4.76 (2H, s, CH<sub>2</sub>), 7.32 (H, m, N-CH), 8.58 (H, s, N-CH). <sup>13</sup>C-NMR (100MHz, D<sub>2</sub>O) δ (ppm) 51.34 (-CH<sub>2</sub>-), 119.23 (N-CH), 122.87 (N-CH), 135.38 (N-CH-N), 172.01 (-COOH). [Cu-Imace-H-H][F]: UV-vis (Acetic acid) λ<sub>max</sub> (nm) 247.38. Elemental analysis: C<sub>10</sub>H<sub>12</sub>F<sub>2</sub>N<sub>4</sub>O<sub>4</sub>Cu·0.5H<sub>2</sub>O, Calc. C 33.11, H 3.61, N 15.44; Found C 32.85, H 3.21, N 15.12. MS (ESI) m/z=157 ([Cu-Imace-H-H]<sup>2+</sup>).

[Imace-H-H][Cl]:  $^1\text{H-NMR}$  (400MHz,  $\text{D}_2\text{O}$ )  $\delta$  (ppm) 4.99 (2H, s,  $\text{CH}_2$ ), 7.31 (H, s, N-CH), 8.63 (H, s, N-CH).  $^{13}\text{C-NMR}$  (100MHz,  $\text{D}_2\text{O}$ )  $\delta$  (ppm) 49.66 ( $-\text{CH}_2-$ ), 119.43 (N-CH), 122.97 (N-CH), 135.81 (N-CH-N), 169.77( $-\text{COOH}$ ). [Cu-Imace-H-H][Cl]: UV-vis (Acetic acid)  $\lambda_{\text{max}}$  (nm) 249.13. Elemental analysis:  $\text{C}_{10}\text{H}_{12}\text{Cl}_2\text{N}_4\text{O}_4\text{Cu}$ , Calc. C 31.06, H 3.13, N 14.49; Found C 30.04, H 2.90, N 15.07. MS (ESI)  $m/z=157$  ( $[\text{Cu-Imace-H-H}]^{2+}$ ).

[Imace-H-H][Br]:  $^1\text{H-NMR}$  (400MHz,  $\text{D}_2\text{O}$ )  $\delta$  (ppm) 4.99 (2H, s,  $\text{CH}_2$ ), 7.32 (H, d, N-CH), 8.64 (H, s, N-CH).  $^{13}\text{C-NMR}$  (100MHz,  $\text{D}_2\text{O}$ )  $\delta$  (ppm) 49.85 ( $-\text{CH}_2-$ ), 119.47 (N-CH), 123.04 (N-CH), 135.84 (N-CH-N), 169.63( $-\text{COOH}$ ). [Cu-Imace-H-H][Br]: UV-vis (Acetic acid)  $\lambda_{\text{max}}$  (nm) 249.48. Elemental analysis:  $\text{C}_{10}\text{H}_{12}\text{Br}_2\text{N}_4\text{O}_4\text{Cu}$ , Calc. C 25.26, H 2.54, N 11.78; Found C 26.20, H 2.45, N 12.32. MS (ESI)  $m/z=157$  ( $[\text{Cu-Imace-H-H}]^{2+}$ ).

[Imace-H-H][I]:  $^1\text{H-NMR}$  (400MHz,  $\text{D}_2\text{O}$ )  $\delta$  (ppm) 4.92 (2H, s,  $\text{CH}_2$ ), 7.39 (H, s, N-CH), 8.67 (H, s, N-CH).  $^{13}\text{C-NMR}$  (100MHz,  $\text{D}_2\text{O}$ )  $\delta$  (ppm) 50.79 ( $-\text{CH}_2-$ ), 119.39 (N-CH), 123.01 (N-CH), 135.64 (N-CH-N), 171.11( $-\text{COOH}$ ). [Cu-Imace-H-H][I]: UV-vis (Acetic acid)  $\lambda_{\text{max}}$  (nm) 248.77. Elemental analysis:  $\text{C}_{10}\text{H}_{12}\text{I}_2\text{N}_4\text{O}_4\text{Cu}$ , Calc. C 21.09, H 2.12, N 9.84; Found C 21.31, H 2.41, N 10.05. MS (ESI)  $m/z=157$  ( $[\text{Cu-Imace-H-H}]^{2+}$ ).

[Imace-H-H][ $\text{NO}_3$ ]:  $^1\text{H-NMR}$  (400MHz,  $\text{D}_2\text{O}$ )  $\delta$  (ppm) 4.98 (2H, s,  $\text{CH}_2$ ), 7.32 (H, d, N-CH), 8.62 (H, s, N-CH).  $^{13}\text{C-NMR}$  (100MHz,  $\text{D}_2\text{O}$ )  $\delta$  (ppm) 49.57 ( $-\text{CH}_2-$ ), 119.42 (N-CH), 122.94 (N-CH), 135.88 (N-CH-N), 169.83( $-\text{COOH}$ ). [Cu-Imace-H-H][ $\text{NO}_3$ ]: UV-vis (Acetic acid)  $\lambda_{\text{max}}$  (nm) 250.34. Elemental analysis:  $\text{C}_{10}\text{H}_{12}\text{N}_6\text{O}_{10}\text{Cu}$ , Calc. C 27.31, H 2.75, N 19.11; Found C 27.99, H 3.02, N 19.30. MS (ESI)  $m/z=157$  ( $[\text{Cu-Imace-H-H}]^{2+}$ ).

[Imace-H-H][ $\text{HSO}_4$ ]:  $^1\text{H-NMR}$  (400MHz,  $\text{D}_2\text{O}$ )  $\delta$  (ppm) 4.86 (2H, s,  $\text{CH}_2$ ), 7.24 (H, s, N-CH), 8.53 (H, s, N-CH).  $^{13}\text{C-NMR}$  (100MHz,  $\text{D}_2\text{O}$ )  $\delta$  (ppm) 49.80 ( $-\text{CH}_2-$ ), 119.40 (N-CH), 122.85 (N-CH), 135.77 (N-CH-N), 170.09( $-\text{COOH}$ ). [Cu-Imace-H-H][ $\text{HSO}_4$ ]: UV-vis (Acetic acid)  $\lambda_{\text{max}}$  (nm) 250.88. Elemental analysis:  $\text{C}_{10}\text{H}_{14}\text{S}_2\text{N}_4\text{O}_{12}\text{Cu}$ , Calc. C 23.56, H 2.77, N 10.99;



Found C 23.47, H 2.83, N 11.33. MS (ESI)  $m/z=157$  ( $[\text{Cu-Imace-H-H}]^{2+}$ ).

$[\text{Imace-H-H}][\text{CF}_3\text{COO}]$ :  $^1\text{H-NMR}$  (400MHz,  $\text{D}_2\text{O}$ )  $\delta$  (ppm) 4.92 (2H, s,  $\text{CH}_2$ ), 7.28 (H, d, N-CH), 8.58 (H, s, N-CH).  $^{13}\text{C-NMR}$  (100MHz,  $\text{D}_2\text{O}$ )  $\delta$  (ppm) 49.61 ( $-\text{CH}_2-$ ), 119.39 (N-CH), 122.90 (N-CH), 135.72 (N-CH-N), 169.82( $-\text{COOH}$ ).  $[\text{Cu-Imace-H-H}][\text{CF}_3\text{COO}]$ : UV-vis (Acetic acid)  $\lambda_{\text{max}}$  (nm) 247.01. Elemental analysis:  $\text{C}_{14}\text{H}_{12}\text{F}_6\text{N}_4\text{O}_8\text{Cu}$ , Calc. C 31.04, H 2.23, N 10.34; Found C 32.07, H 2.43, N 10.04. MS (ESI)  $m/z=157$  ( $[\text{Cu-Imace-H-H}]^{2+}$ ).

$[\text{Imace-H-H}][\text{BF}_4]$ :  $^1\text{H-NMR}$  (400MHz,  $\text{D}_2\text{O}$ )  $\delta$  (ppm) 4.92 (2H, s,  $\text{CH}_2$ ), 7.38 (H, s, N-CH), 8.65 (H, s, N-CH).  $^{13}\text{C-NMR}$  (100MHz,  $\text{D}_2\text{O}$ )  $\delta$  (ppm) 50.85 ( $-\text{CH}_2-$ ), 119.37 (N-CH), 122.96 (N-CH), 135.64 (N-CH-N), 170.89( $-\text{COOH}$ ).  $[\text{Cu-Imace-H-H}][\text{BF}_4]$ : UV-vis (Acetic acid)  $\lambda_{\text{max}}$  (nm) 246.48. Elemental analysis:  $\text{C}_{10}\text{H}_{12}\text{B}_2\text{F}_8\text{N}_4\text{O}_4\text{Cu}$ , Calc. C 24.54, H 2.47, N 11.45; Found C 23.81, H 2.56, N 12.03. MS (ESI)  $m/z=157$  ( $[\text{Cu-Imace-H-H}]^{2+}$ ).

$[\text{Imace-H-H}][\text{PF}_6]$ :  $^1\text{H-NMR}$  (400MHz,  $\text{D}_2\text{O}$ )  $\delta$  (ppm) 5.02 (2H, s,  $\text{CH}_2$ ), 7.39 (H, dt, N-CH), 8.68 (H, t, N-CH).  $^{13}\text{C-NMR}$  (100MHz,  $\text{D}_2\text{O}$ )  $\delta$  (ppm) 49.83 ( $-\text{CH}_2-$ ), 119.47 (N-CH), 122.97 (N-CH), 135.89 (N-CH-N), 170.27( $-\text{COOH}$ ).  $[\text{Cu-Imace-H-H}][\text{PF}_6]$ : UV-vis (Acetic acid)  $\lambda_{\text{max}}$  (nm) 247.18. Elemental analysis:  $\text{C}_{10}\text{H}_{12}\text{Cl}_2\text{N}_4\text{O}_4\text{Cu}$ , Calc. C 24.54, H 2.47, N 11.45; Found C 25.08, H 2.66, N 11.62. MS (ESI)  $m/z=157$  ( $[\text{Cu-Imace-H-H}]^{2+}$ ).

$[\text{Imace-CH}_3\text{-H}][\text{Cl}]$ :  $^1\text{H-NMR}$  (400MHz,  $\text{D}_2\text{O}$ )  $\delta$  (ppm) 2.46 (H, s,  $-\text{CH}_3$ ), 5.01 (2H, s,  $\text{CH}_2$ ), 7.36 (H, s, N-CH).  $^{13}\text{C-NMR}$  (100MHz,  $\text{D}_2\text{O}$ )  $\delta$  (ppm) 9.13 ( $-\text{CH}_3$ ), 49.14 ( $-\text{CH}_2-$ ), 122.36 (N-CH), 122.37 (N-CH), 146.86 (N-CH-N), 169.41 ( $-\text{COOH}$ ).  $[\text{Cu-Imace-CH}_3\text{-H}][\text{Cl}]$ : UV-vis (Acetic acid)  $\lambda_{\text{max}}$  (nm) 251.78. Elemental analysis:  $\text{C}_{12}\text{H}_{16}\text{Cl}_2\text{N}_4\text{O}_4\text{Cu}$ : Calc. C 34.75, H 3.89, N 13.51; Found C 35.01, H 3.30, N 14.04. MS (ESI)  $m/z=171$  ( $[\text{Cu-Imace-CH}_3\text{-H}]^{2+}$ ).

$[\text{Cu-Imace-H-CH}_3][\text{I}]$ : UV-vis (Acetic acid)  $\lambda_{\text{max}}$  (nm) 248.80. Elemental analysis:  $\text{C}_{12}\text{H}_{16}\text{I}_2\text{N}_4\text{O}_4\text{Cu}$ , Calc. C 24.12, H 2.70, N 9.37; Found C 25.16, H 3.09, N 10.32. MS (ESI)  $m/z=171$  ( $[\text{Cu-Imace-H-CH}_3]^{2+}$ ).

## 5 The original NMR spectrum

<sup>1</sup>H NMR

[Imace-H-H][F]

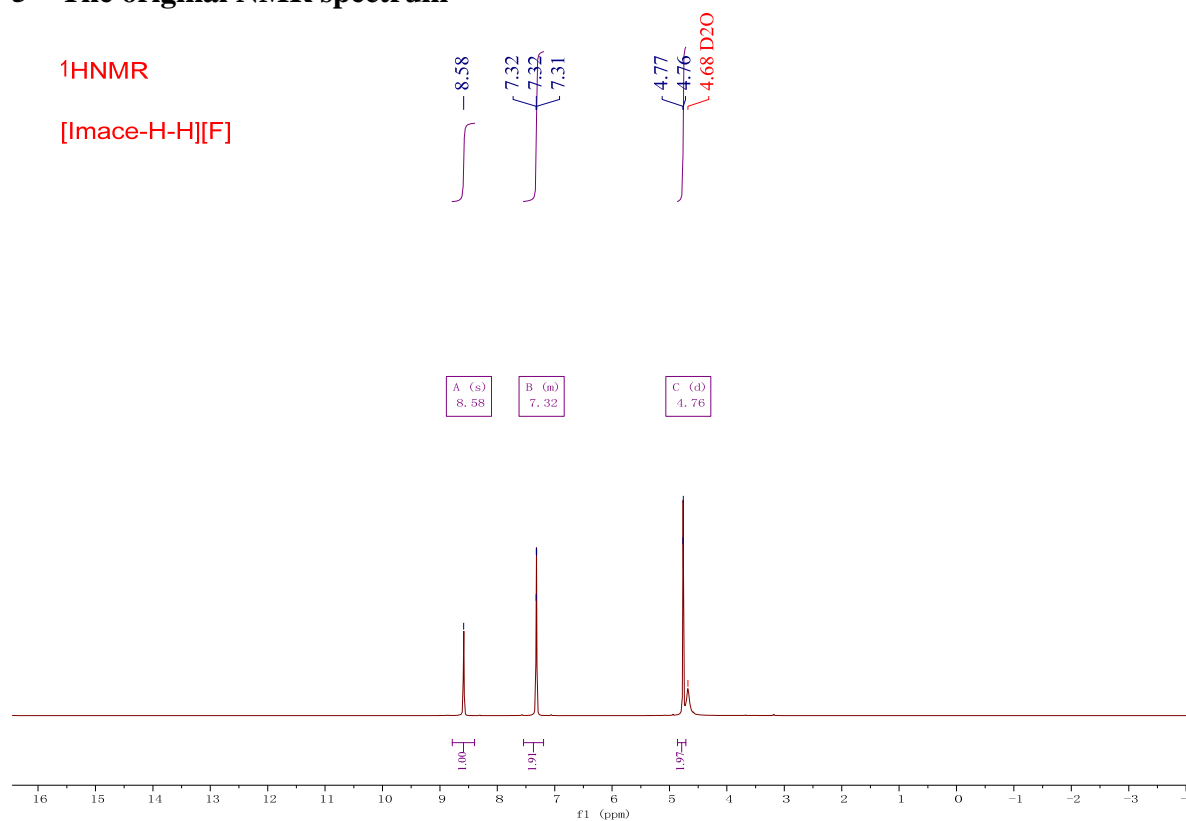

<sup>13</sup>C NMR

[Imace-H-H][F]

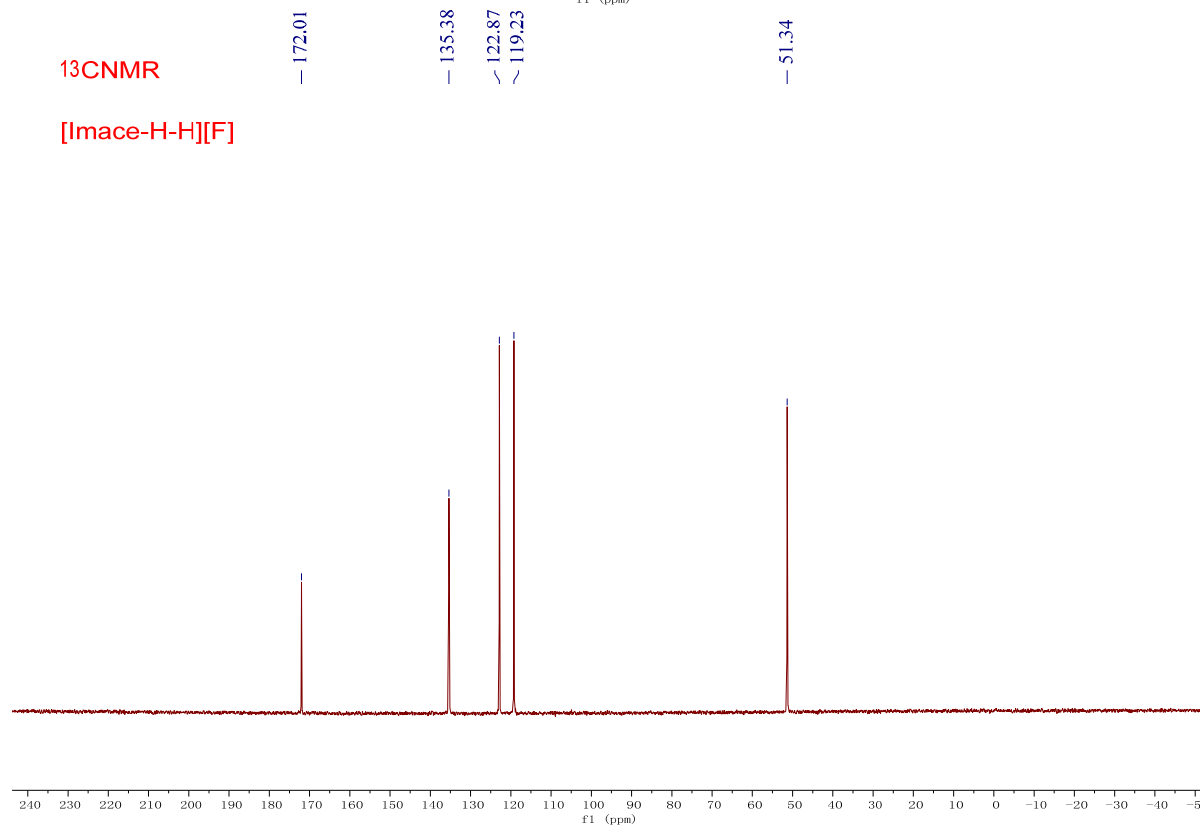

**<sup>1</sup>H NMR**  
[Imace-H-H][Cl]

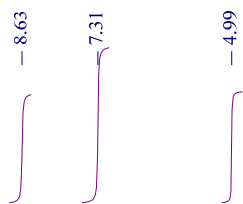

| Chemical Shift (ppm) | Integration |
|----------------------|-------------|
| 8.63                 | 0.70        |
| 7.31                 | 1.00        |
| 4.99                 | 0.72        |

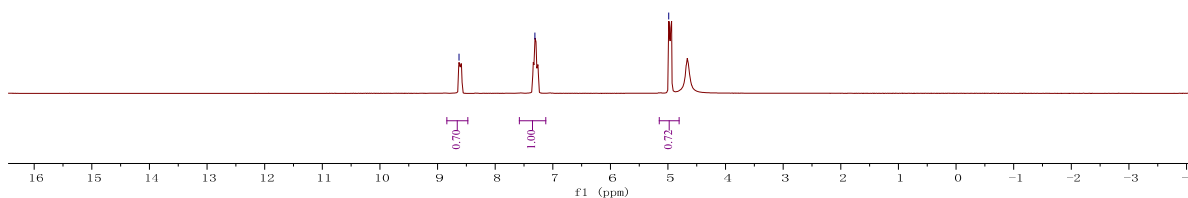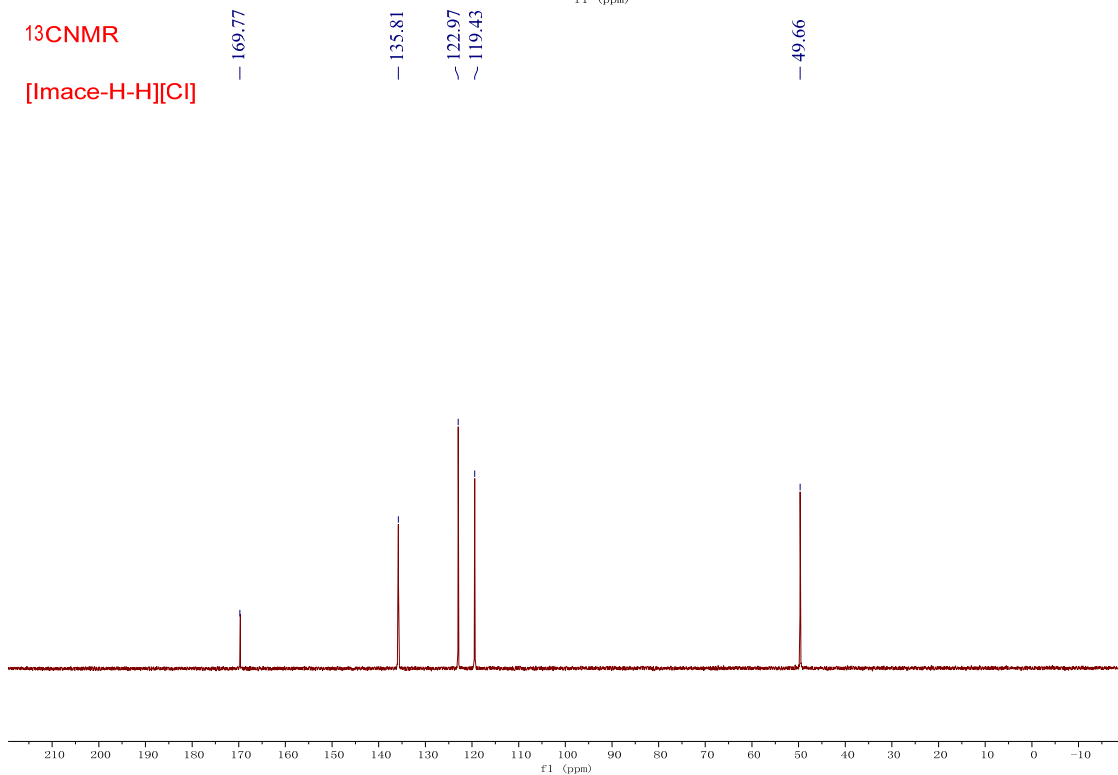

**1HNMR**

**[Imace-H-H][Br]**

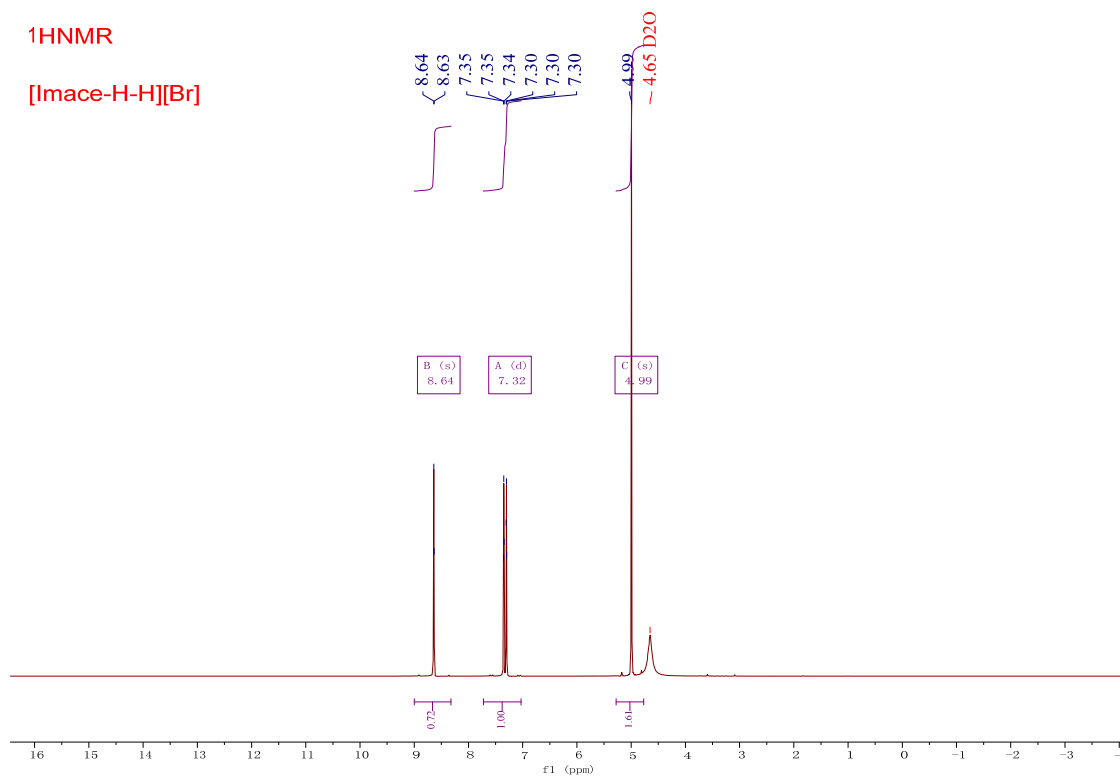

**13CNMR**

**[Imace-H-H][Br]**

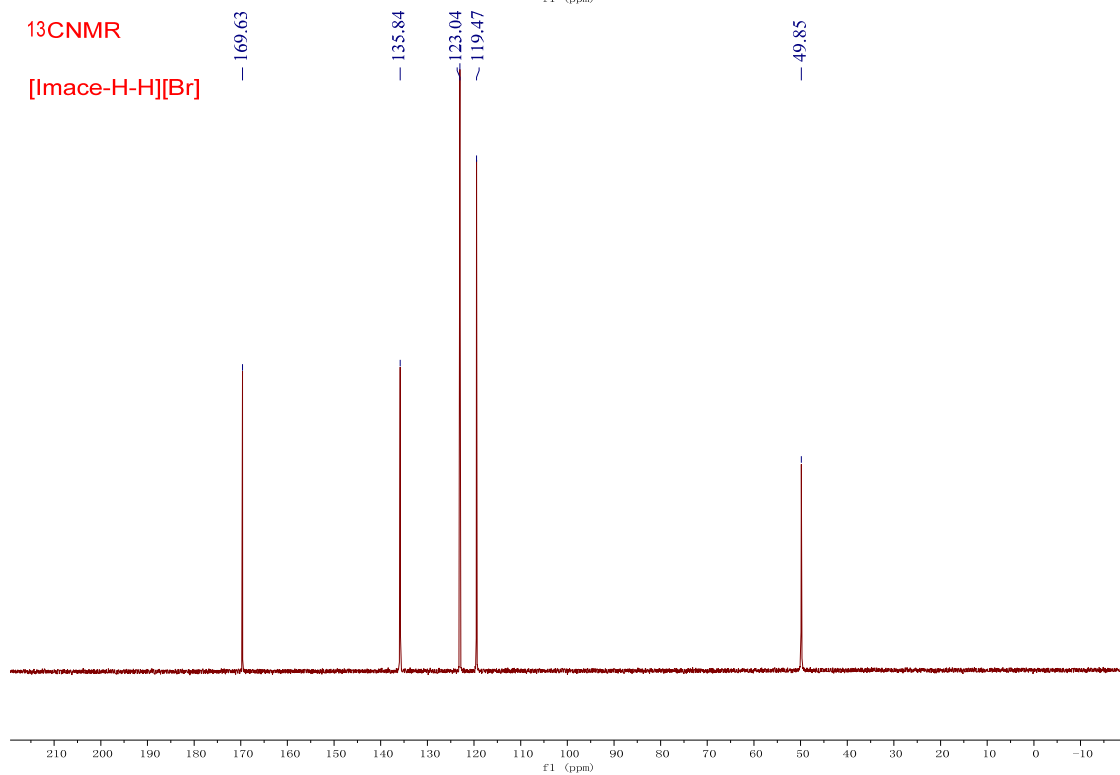

**<sup>1</sup>H NMR**

[Image-H-H][1]

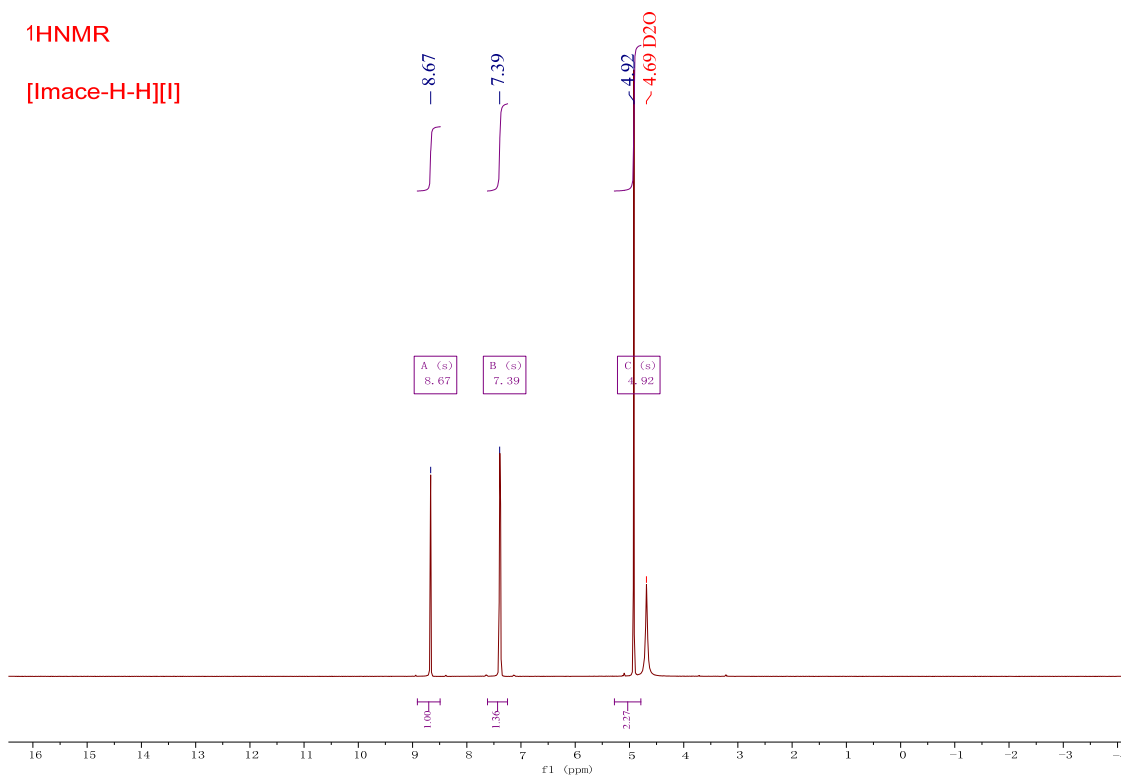

**<sup>13</sup>C NMR**

[Image-H-H][1]

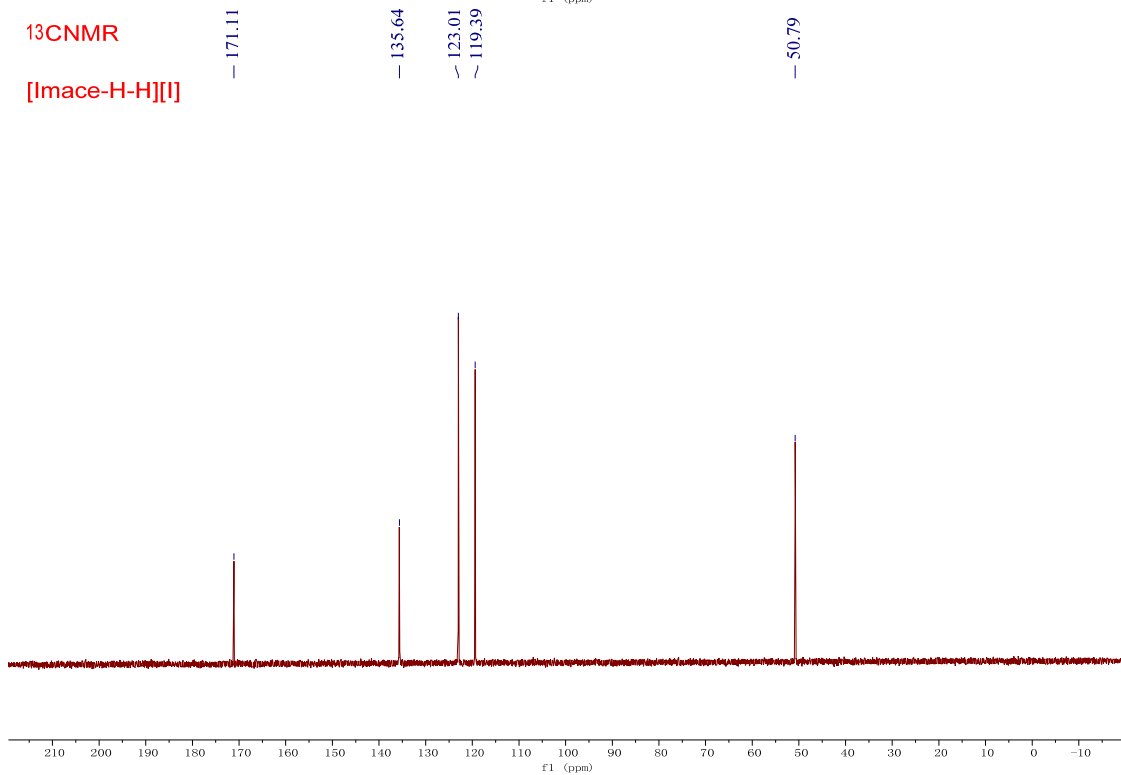

**1HNMR**

**[Imace-H-H][NO<sub>3</sub>]**

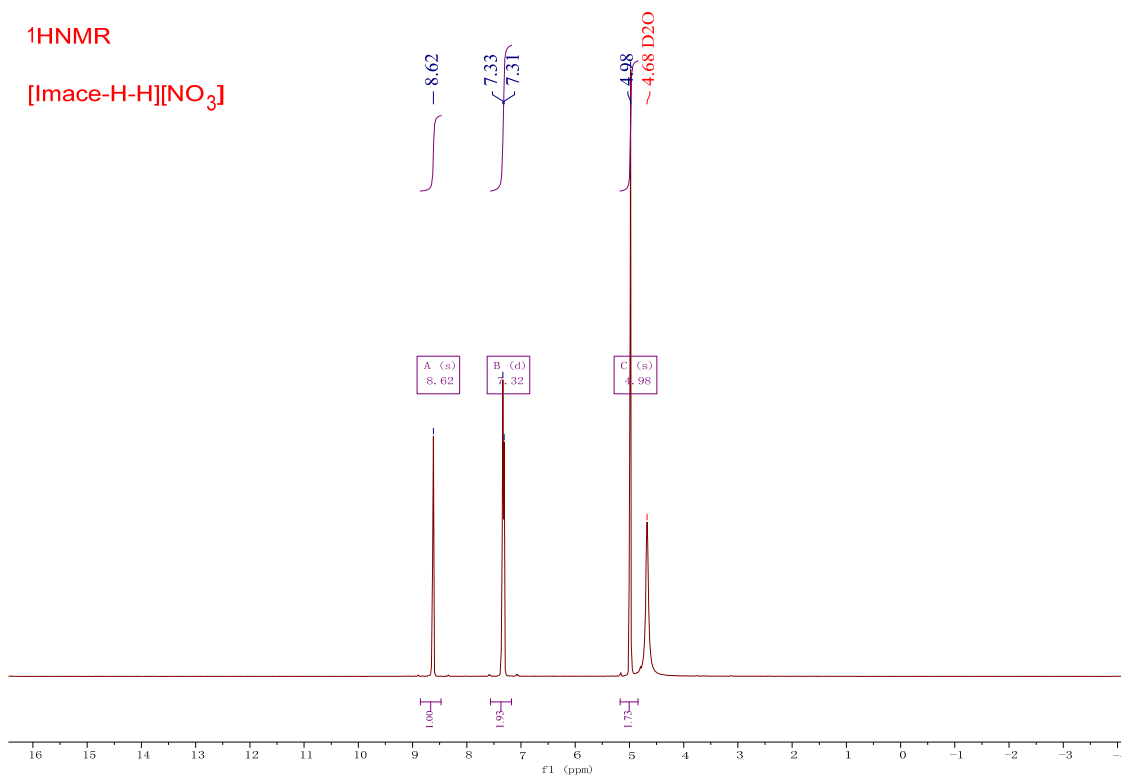

**13CNMR**

**[Imace-H-H][NO<sub>3</sub>]**

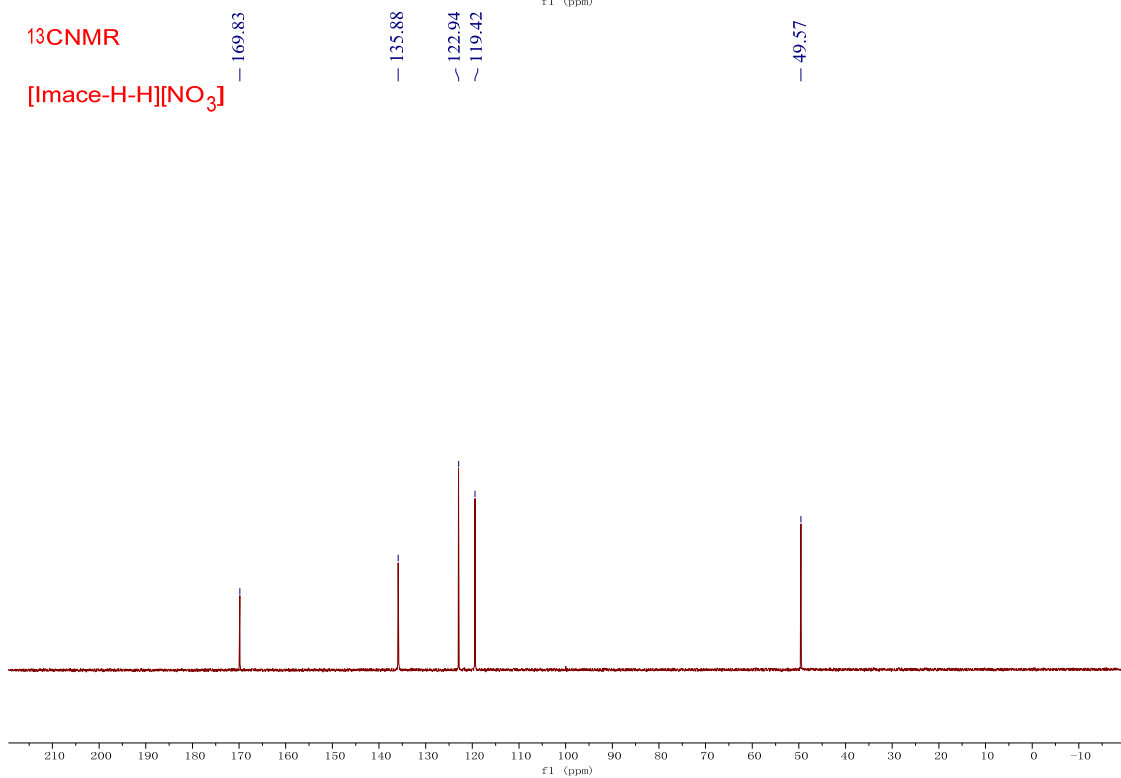

**<sup>1</sup>H NMR**

[Imace-H-H][HSO<sub>4</sub>]

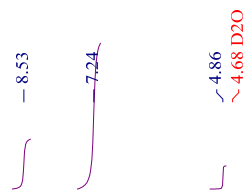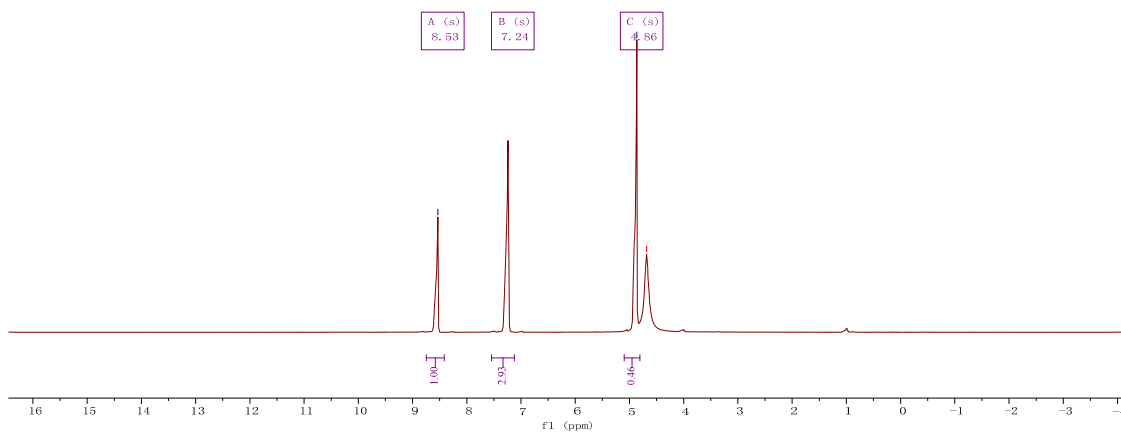

**<sup>1</sup>H NMR**

**[Imace-H-H][CF<sub>3</sub>COO]**

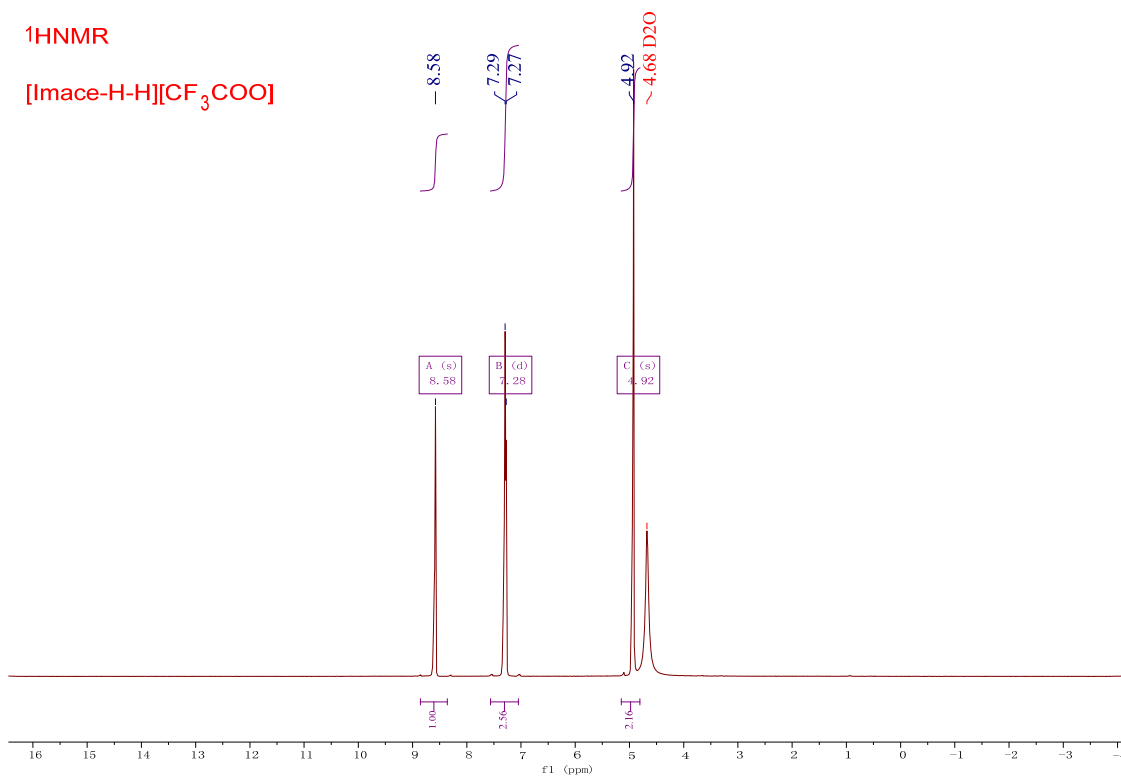

**<sup>13</sup>C NMR**

**[Imace-H-H][CF<sub>3</sub>COO]**

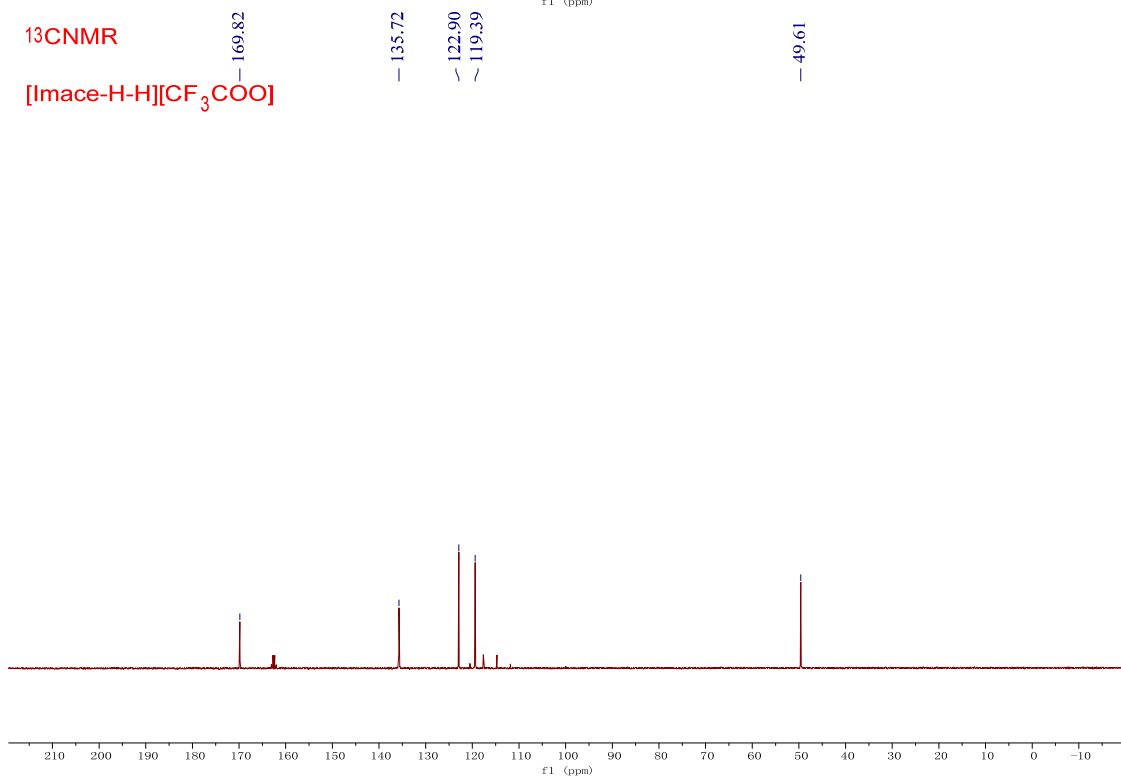



**<sup>1</sup>H NMR**

**[Imace-H-H][BF<sub>4</sub>]**

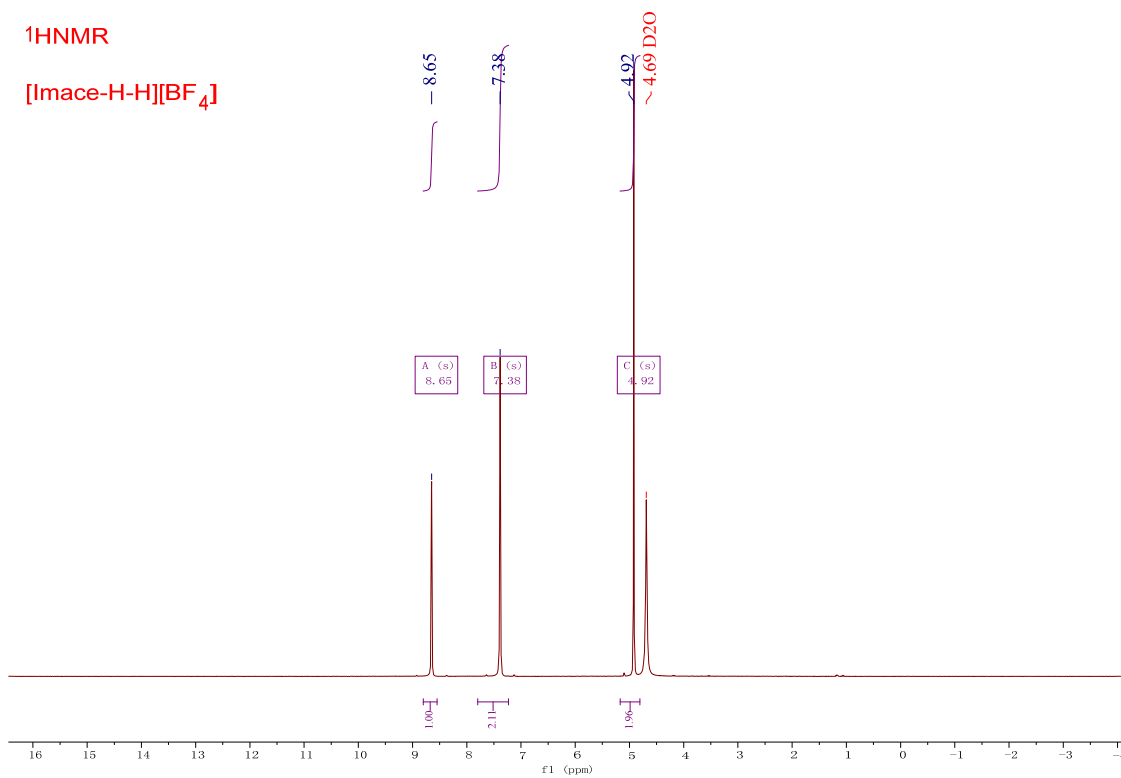

**<sup>13</sup>C NMR**

**[Imace-H-H][BF<sub>4</sub>]**

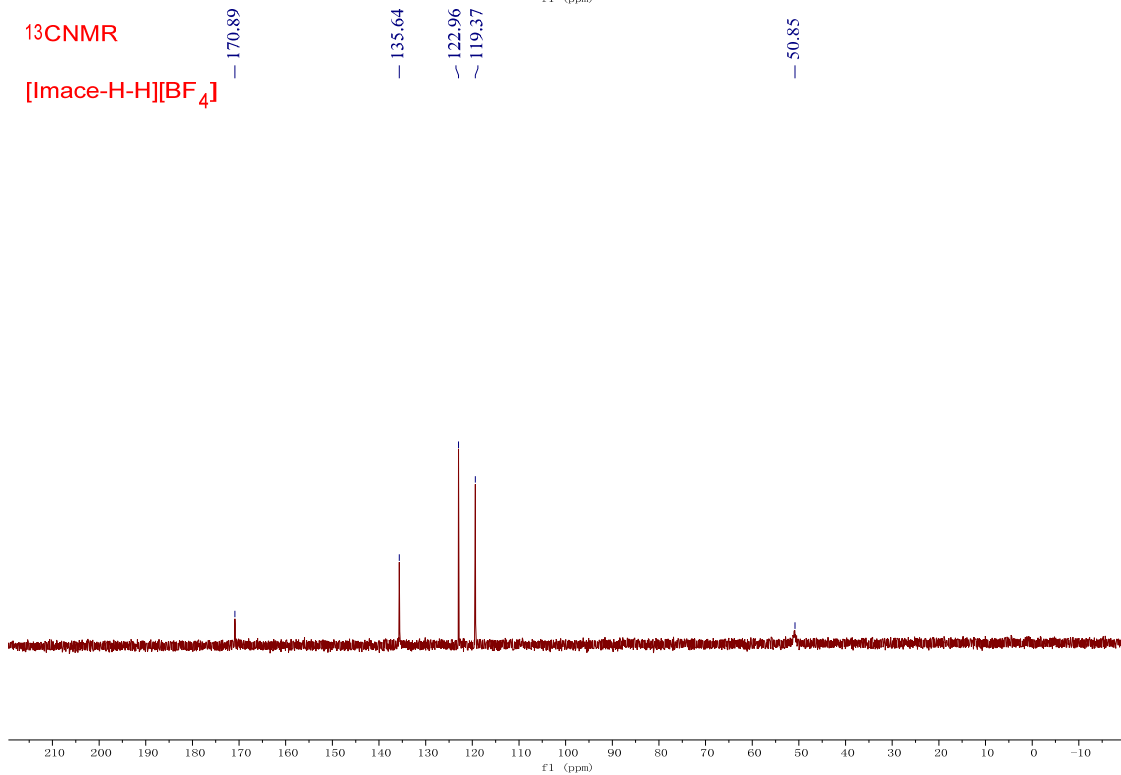

**<sup>1</sup>H NMR**

**[Imace-H-H][PF<sub>6</sub>]**

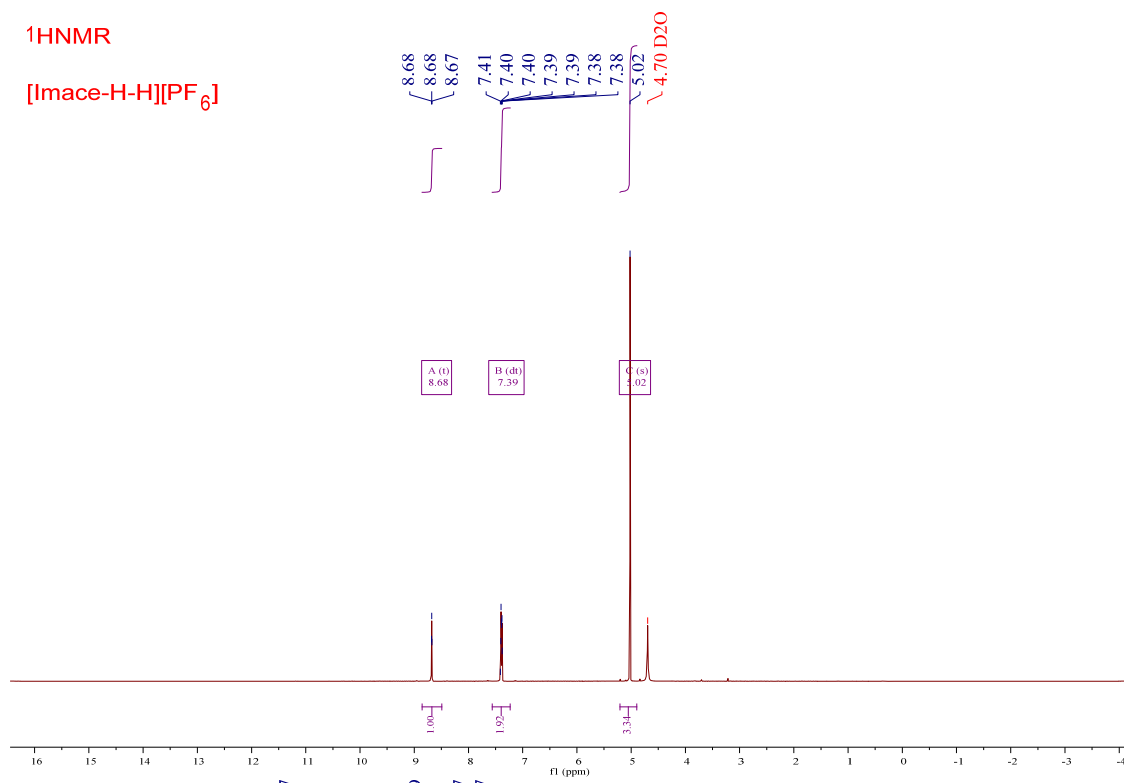

**<sup>13</sup>C NMR**

**[Imace-H-H][PF<sub>6</sub>]**

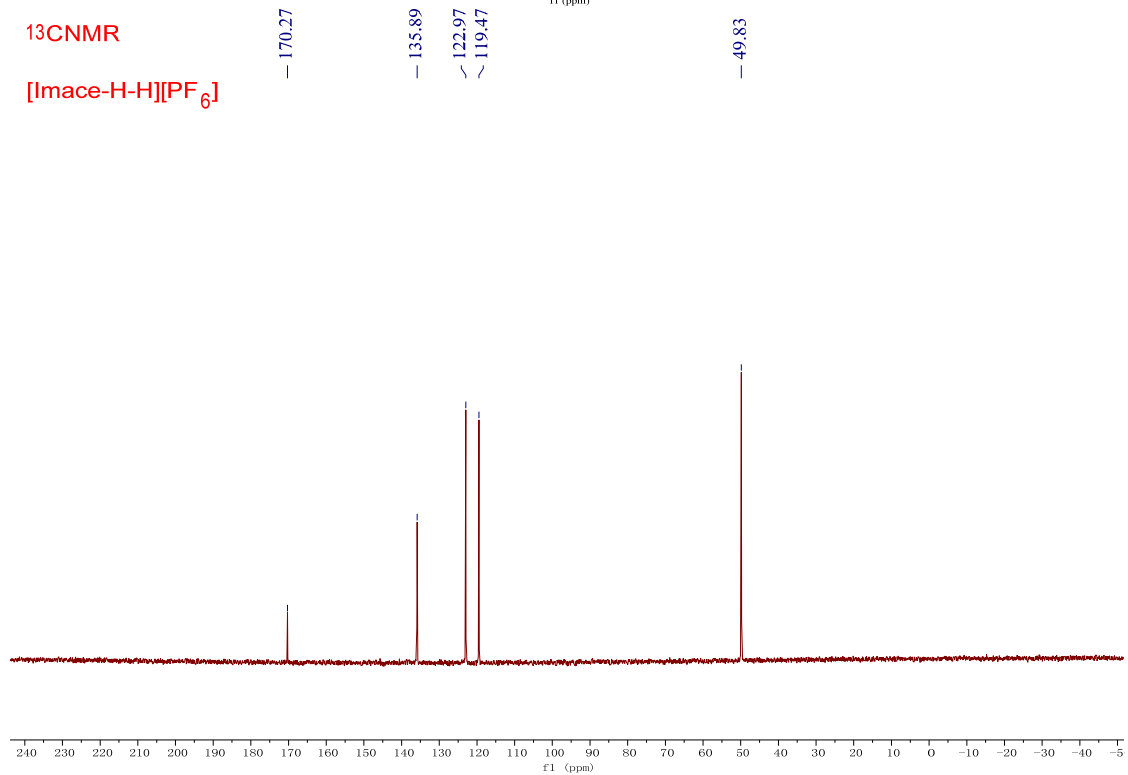

**<sup>1</sup>H NMR**

[Imace-H-H]

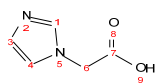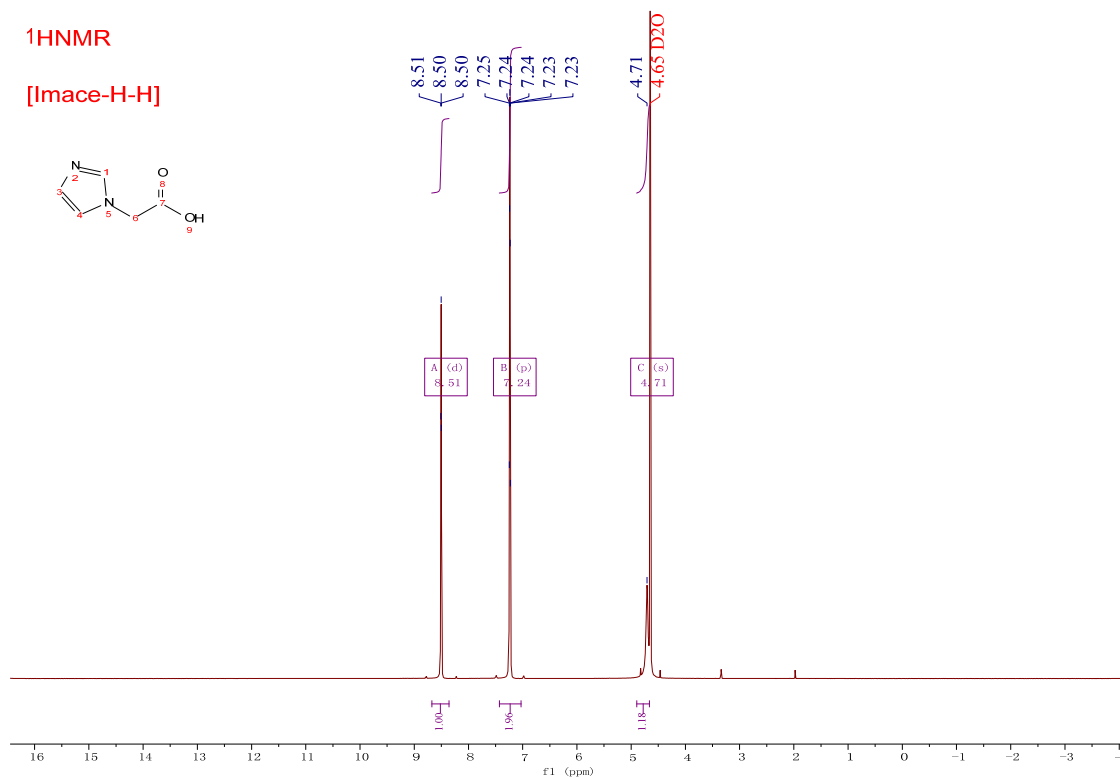

**<sup>13</sup>C NMR**

[Imace-H-H]

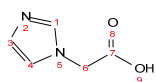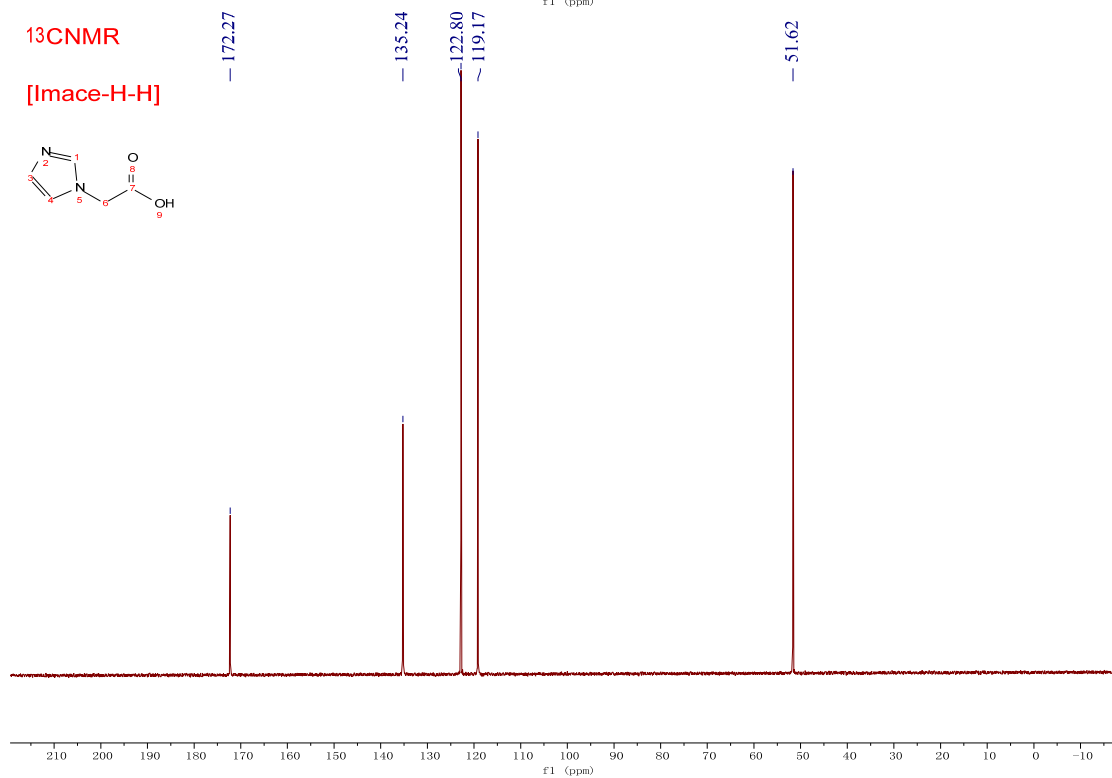

**<sup>1</sup>H NMR**

[Imace-CH<sub>3</sub>-H]

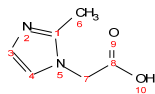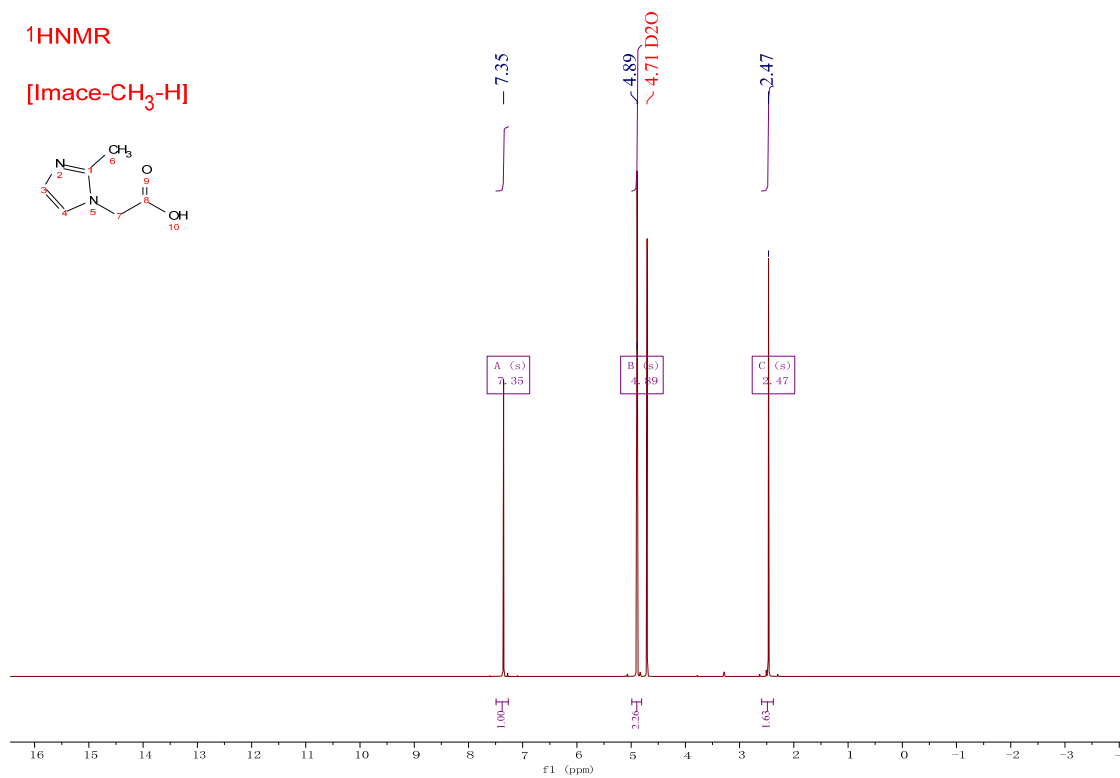

**<sup>13</sup>C NMR**

[Imace-CH<sub>3</sub>-H]

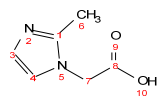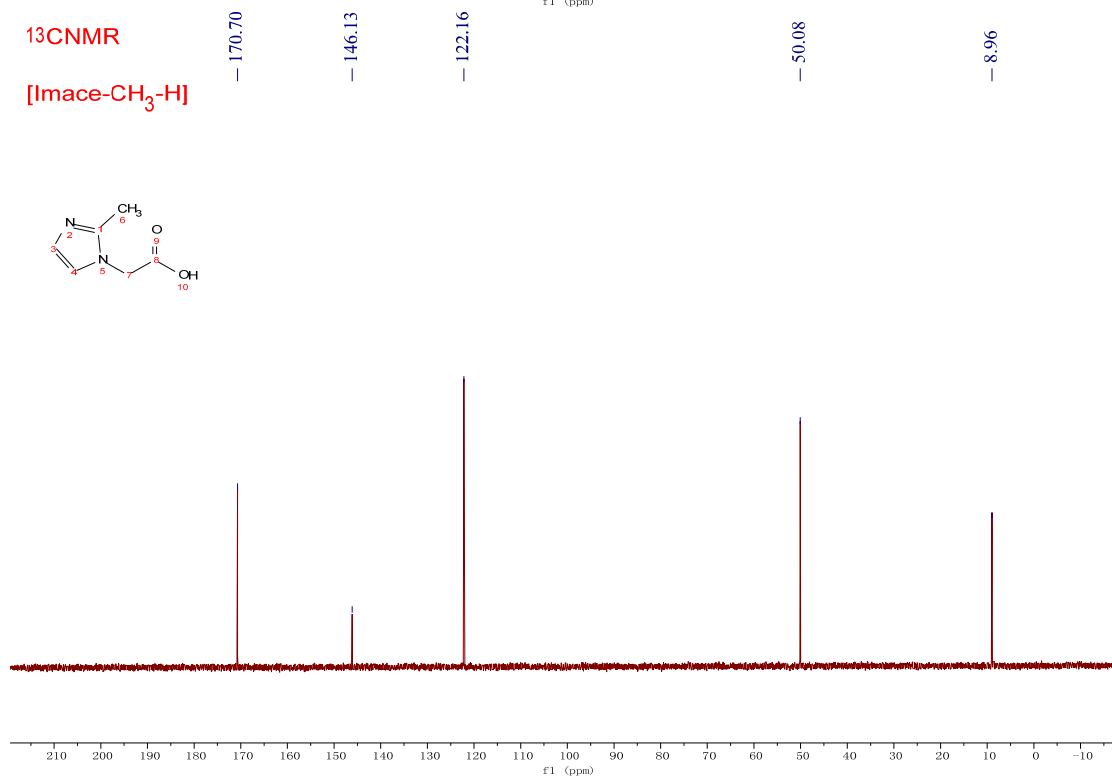

**<sup>1</sup>H NMR**

**[Imace-CH<sub>3</sub>-H][Cl]**

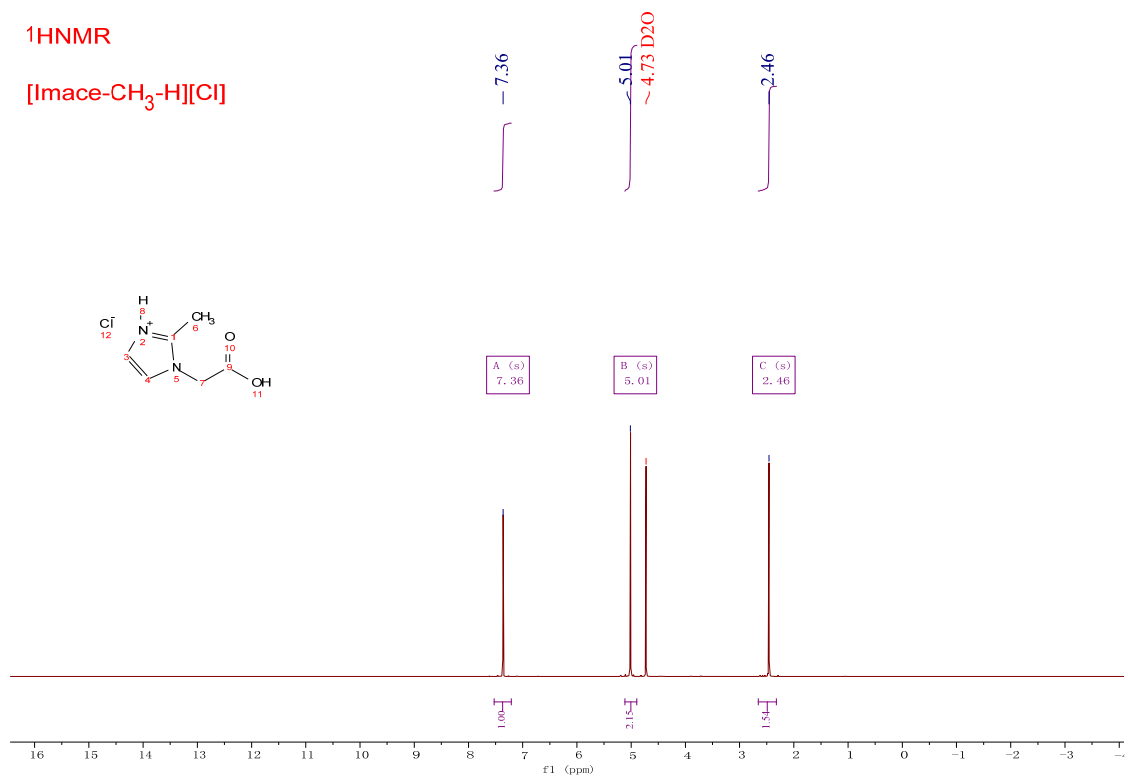

**<sup>13</sup>C NMR**

**[Imace-CH<sub>3</sub>-H][Cl]**

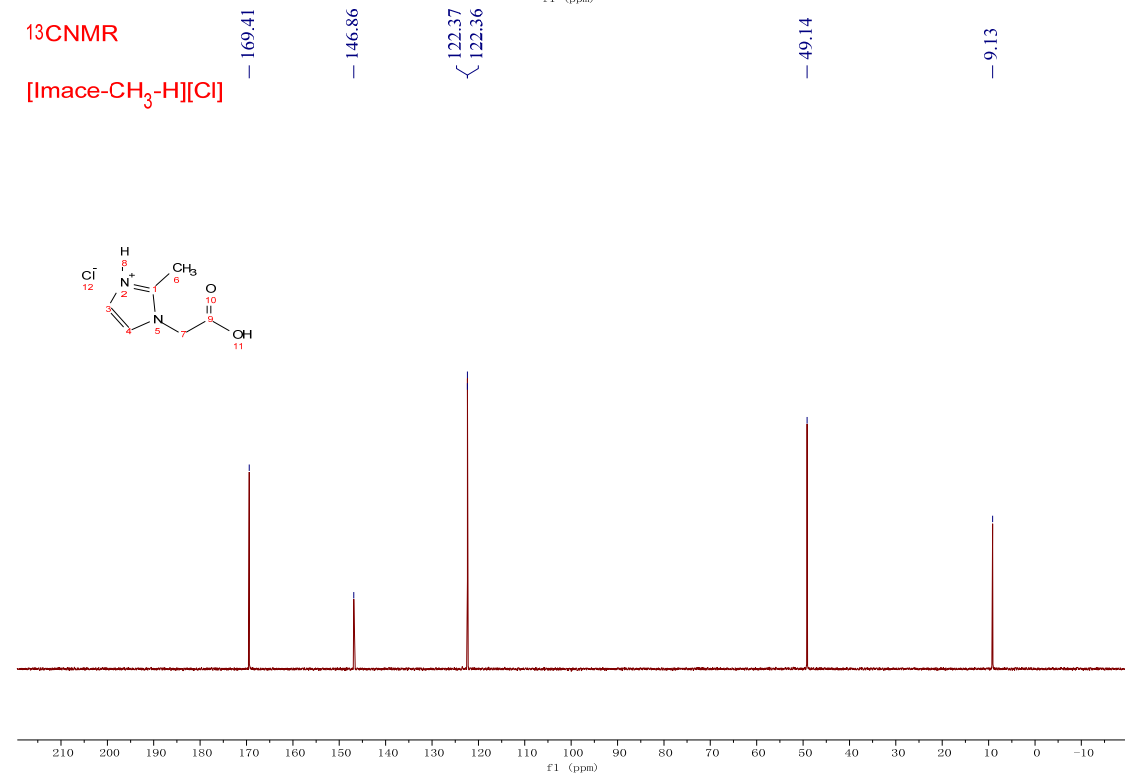

## 6 The GC conditions for each of the substrates tested

The quantitative analysis of reactants and products was performed on a Shimadzu GC2014 gas chromatograph equipped with a WondaCAP-5 capillary column (5% Diphenyl 95% Dimethylpolysiloxane 30m×0.32mm×0.25µm) with a flame-ionization detector. A Shimadzu GCMS-QP2010 was used to identify substrates and their oxidation products resulting from catalysis.

### GC Condition:

Injection Port SPL1  
Injection Mode: Split  
Carrier Gas: N2  
Flow Control: Pressure  
Pressure: 45.8 KPa  
Total Flow: 37.7 mL/min  
Column Flow: 1.33 mL/min  
Purge Flow: 3.0 mL/min  
Splitter Ratio: 25

### GC methods:

#### Method 1

Injection Port temperature: 280 °C  
FID Detector Temperature: 290 °C  
[Column Oven]  
Initial Temperature: 50 °C  
Equilibration Time: 2.0 min  
=Column Oven Temperature Program=  
Total Program Time: 10.67min

|   | Rate(°C/min) | Temperature(°C) | Hold Time(min) |
|---|--------------|-----------------|----------------|
| 0 | -            | 50.0            | 1.00           |
| 1 | 15.0         | 180.0           | 1.00           |

#### Method 2

Injection Port temperature: 280 °C  
FID Detector Temperature: 290 °C  
[Column Oven]  
Initial Temperature: 50 °C  
Equilibration Time: 2.0 min  
=Column Oven Temperature Program=  
Total Program Time: 15.67 min

|   | Rate(°C/min) | Temperature(°C) | Hold Time(min) |
|---|--------------|-----------------|----------------|
| 0 | -            | 50.0            | 1.00           |
| 1 | 15.0         | 180.0           | 1.00           |
| 2 | 20.0         | 240.0           | 2              |

Method 3

Injection Port temperature: 280 °C

FID Detector Temperature: 290 °C

[Column Oven]

Initial Temperature: 40 °C

Equilibration Time: 2.0 min

=Column Oven Temperature Program=

Total Program Time: 11.0 min

|   | Rate(°C/min) | Temperature(°C) | Hold Time(min) |
|---|--------------|-----------------|----------------|
| 0 | -            | 40.0            | 3.00           |
| 1 | 20.0         | 180.0           | 1.00           |

Method 4

Injection Port temperature: 290 °C

FID Detector Temperature: 300 °C

[Column Oven]

Initial Temperature: 120 °C

Equilibration Time: 2.0 min

=Column Oven Temperature Program=

Total Program Time: 15.17 min

|   | Rate(°C/min) | Temperature(°C) | Hold Time(min) |
|---|--------------|-----------------|----------------|
| 0 | -            | 120.0           | 1.00           |
| 1 | 15.0         | 220.0           | 1.00           |
| 2 | 20.0         | 250.0           | 5.00           |

Method 5

Injection Port temperature: 290 °C

FID Detector Temperature: 300 °C

[Column Oven]

Initial Temperature: 70 °C

Equilibration Time: 2.0 min

=Column Oven Temperature Program=

Total Program Time: 13.00 min

|   | Rate(°C/min) | Temperature(°C) | Hold Time(min) |
|---|--------------|-----------------|----------------|
| 0 | -            | 70.0            | 1.00           |
| 1 | 20.0         | 250.0           | 3.00           |

| substrate                                                                           | GC Method | Substrate Ret. Time(min) | Products & Ret. Time (min)                                                                                                                                                                                                                                                                                                                                                            |
|-------------------------------------------------------------------------------------|-----------|--------------------------|---------------------------------------------------------------------------------------------------------------------------------------------------------------------------------------------------------------------------------------------------------------------------------------------------------------------------------------------------------------------------------------|
|  | Method 1  | 3.426                    |  5.196<br> 5.550<br> 6.128<br> 7.829 |
|  | Method 1  | 3.165                    |  5.942                                                                                                                                                                                                                                                                                             |

|                                                                                     |             |       |                                                                                           |                                                                                             |
|-------------------------------------------------------------------------------------|-------------|-------|-------------------------------------------------------------------------------------------|---------------------------------------------------------------------------------------------|
| 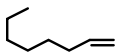   | Method<br>2 | 7.224 |  10.632  |                                                                                             |
|    | Method<br>2 | 9.215 |  11.741  |                                                                                             |
|    | Method<br>3 | 3.113 |  4.937   |                                                                                             |
|    | Method<br>2 | 5.767 |  6.008   |                                                                                             |
|    | Method<br>1 | 4.080 |  5.165   |                                                                                             |
|    | Method<br>5 | 4.021 |  5.214   |                                                                                             |
|    | Method<br>5 | 4.660 |  5.504   |                                                                                             |
|  | Method<br>2 | 3.779 |  7.371 |                                                                                             |
|  | Method<br>1 | 3.077 |  3.444 |                                                                                             |
|  | Method<br>2 | 3.985 |  5.137 |                                                                                             |
|  | Method<br>4 | 4.309 |  4.731 |  6.609 |
|  | Method<br>4 | 3.910 |  4.420 |  4.860 |
|  | Method<br>4 | 4.374 |  4.731 |  5.735 |

## 7 The original GC-MS of products



行号#:3 保留时间:2.055(扫描数#:212) 质量峰:391  
原始模式:单个 2.055(212) 基峰:43.05(2903257)  
背景模式:无 组 1 - 事件 1

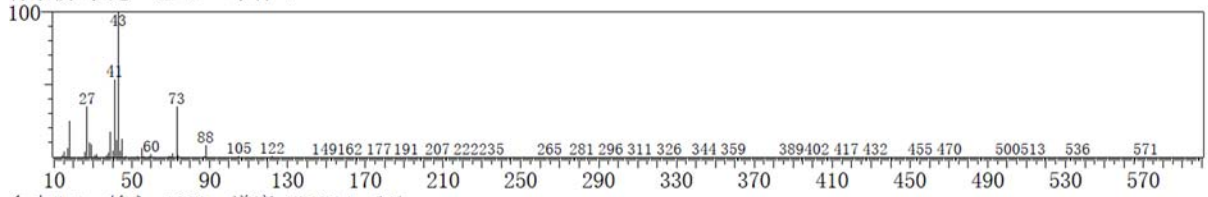

命中#:1 输入:1029 谱库:NIST14s.lib  
SI:93 分子式:C4H8O2 CAS:79-31-2 摩尔质量:88 保留指数:711  
组分名称:Propanoic acid, 2-methyl- \$\$ Isobutyric acid \$\$ .alpha.-Methylprop.

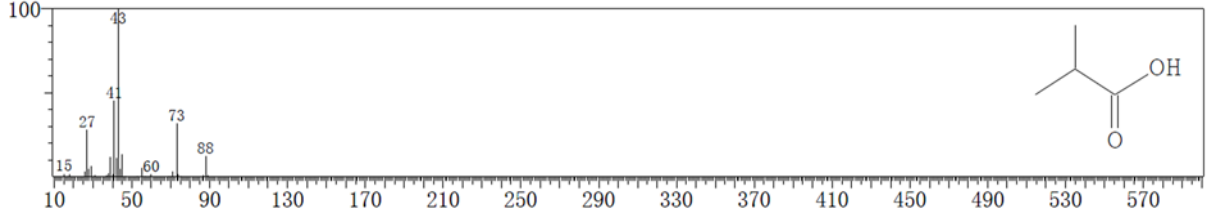

行号#:8 保留时间:3.510(扫描数#:603) 质量峰:300  
原始模式:单个 3.510(603) 基峰:83.00(3254030)  
背景模式:无 组 1 - 事件 1

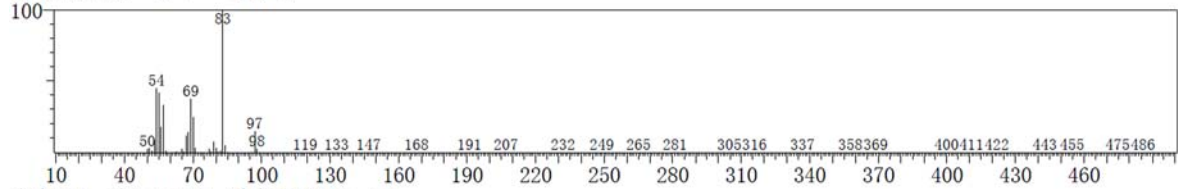

命中#:1 输入:1558 谱库:NIST14s.lib  
SI:96 分子式:C6H10O CAS:286-20-4 摩尔质量:98 保留指数:731  
组分名称:7-Oxabicyclo[4.1.0]heptane \$\$ Cyclohexane, 1,2-epoxy- \$\$ Cyclohexene oxide :

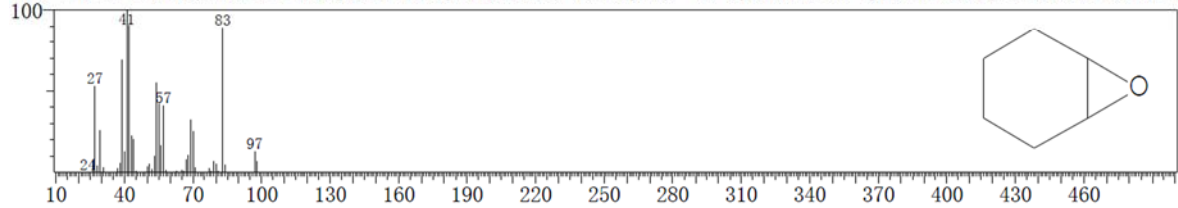

行号#:11 保留时间:3.805(扫描数#:662) 质量峰:308  
原始模式:单个 3.805(662) 基峰:70.00(8212481)  
背景模式:无 组 1 - 事件 1

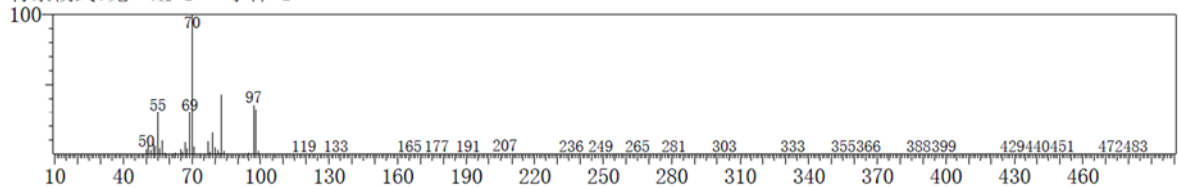

命中#:1 输入:1613 谱库:NIST14s.lib  
SI:96 分子式:C6H10O CAS:822-67-3 摩尔质量:98 保留指数:890  
组分名称:2-Cyclohexen-1-ol \$\$ Cyclohexen-3-ol \$\$ 1-Cyclohexen-3-ol \$\$ 2-Cyclohexenol \$\$ 3-Hydroxycyclohexen

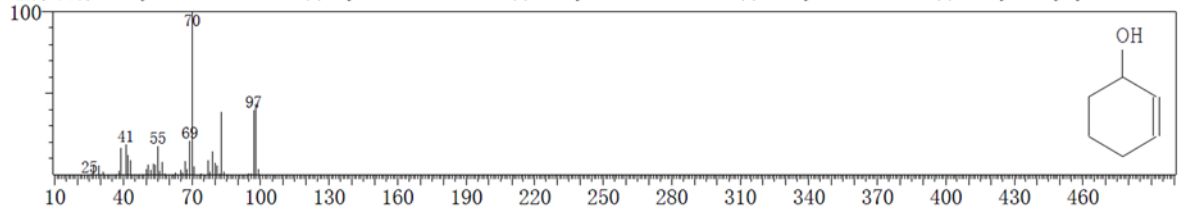

行号#:8 保留时间:4.360(扫描数#:773) 质量峰:314  
原始模式:单个 4.360(773) 基峰:68.00(3558417)  
背景模式:无 组 1 - 事件 1

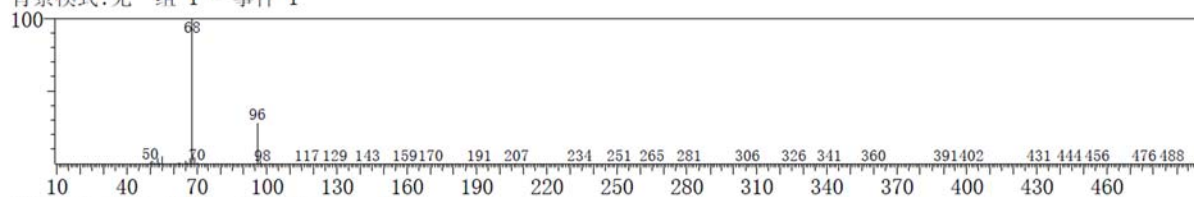

命中#:1 输入:1427 谱库:NIST14s.lib  
SI:98 分子式:C6H8O CAS:930-68-7 摩尔质量:96 保留指数:873  
组分名称:2-Cyclohexen-1-one \$\$ Cyclohex-2-en-1-one \$\$ Cyclohexen-2-one \$\$ 1-Cyclohexen-3-one \$\$ 2-Cyclohexen-1-one

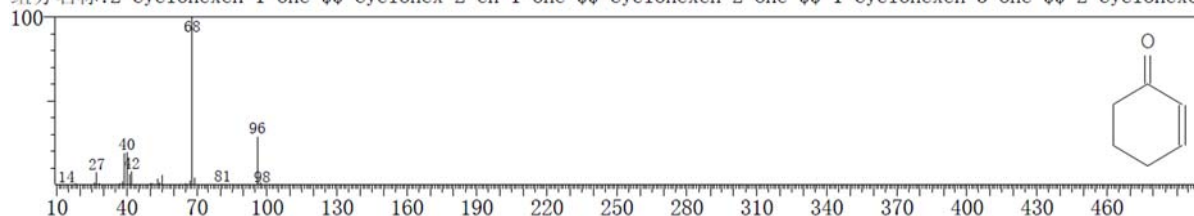

原始模式:单个 8.450(1291) 基峰:70.05(6278360)  
背景模式:无 组 1 - 事件 1

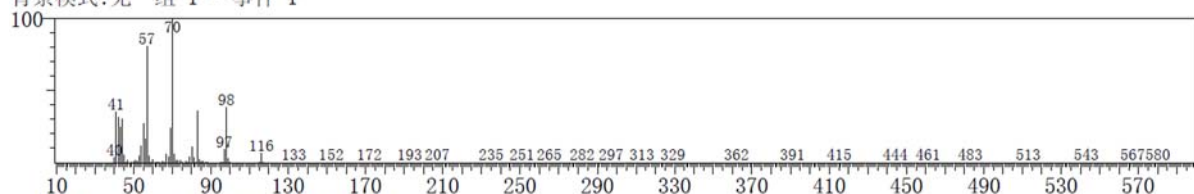

命中#:1 输入:4655 谱库:NIST14.lib  
SI:97 分子式:C6H12O2 CAS:1460-57-7 摩尔质量:116 保留指数:1096  
组分名称:1,2-Cyclohexanediol, trans- \$\$ trans-1,2-Cyclohexanediol \$\$ trans-1,2-Dihydroxycyclohexane \$\$ 1,2-

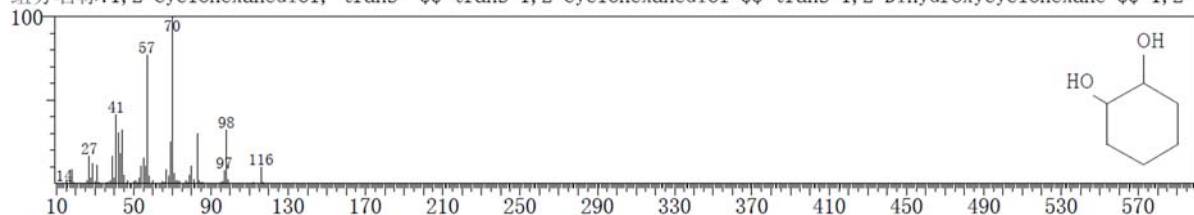

行号#:13 保留时间:4.750(扫描数#:751) 质量峰:397  
原始模式:单个 4.750(751) 基峰:55.05(5724454)  
背景模式:无 组 1 - 事件 1

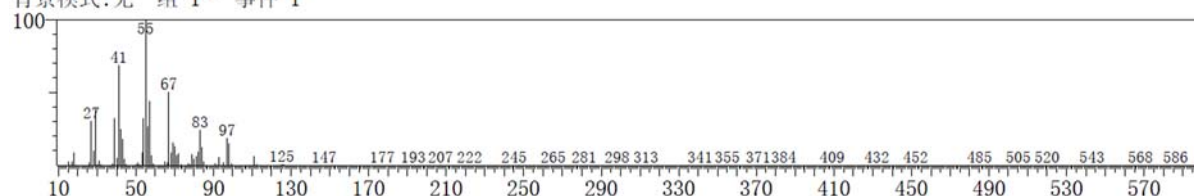

命中#:1 输入:6652 谱库:NIST14.lib  
SI:96 分子式:C8H14O CAS:4925-71-7 摩尔质量:126 保留指数:970  
组分名称:9-Oxabicyclo[6.1.0]nonane, cis- \$\$ 9-Oxabicyclo[6.1.0]nonane # \$\$

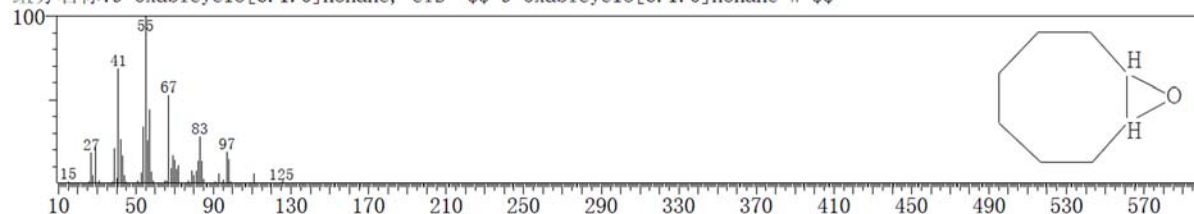

行号#:4 保留时间:2.680(扫描数#:437) 质量峰:393  
原始模式:单个 2.680(437) 基峰:55.05(8405105)  
背景模式:无 组 1 - 事件 1

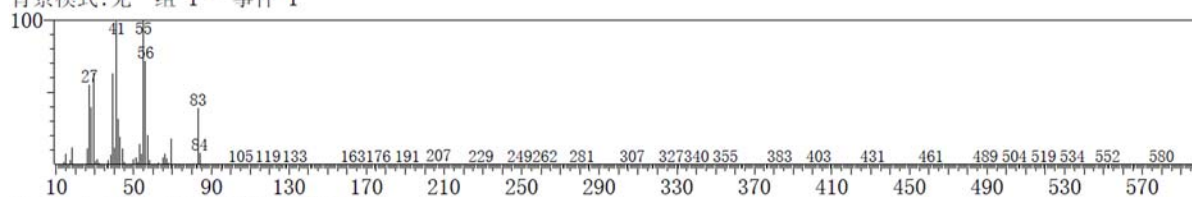

命中#:1 输入:695 谱库:NIST14.lib  
SI:93 分子式:C5H8O CAS:285-67-6 摩尔质量:84 保留指数:611  
组分名称:6-Oxabicyclo[3.1.0]hexane \$\$ Cyclopentane oxide \$\$ Cyclopentane, 1,2-epoxy- \$\$ Cyclopentene epoxide

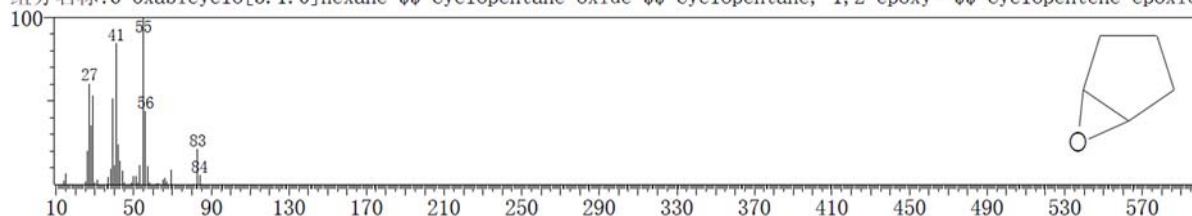

行号#:3 保留时间:2.850(扫描数#:371) 质量峰:376  
原始模式:单个 2.850(371) 基峰:77.05(2290663)  
背景模式:无 组 1 - 事件 1

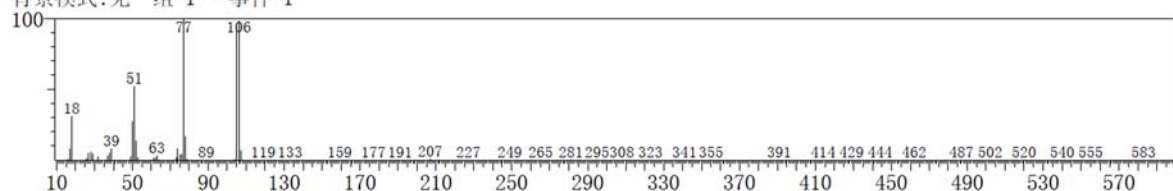

命中#:1 输入:2701 谱库:NIST14.lib  
SI:95 分子式:C7H6O CAS:100-52-7 摩尔质量:106 保留指数:982  
组分名称:Benzaldehyde \$\$ Artificial Almond Oil \$\$ Benzaldehyde FFC \$\$ Benzenecarbonal \$\$ Benzenecarboxaldehyde

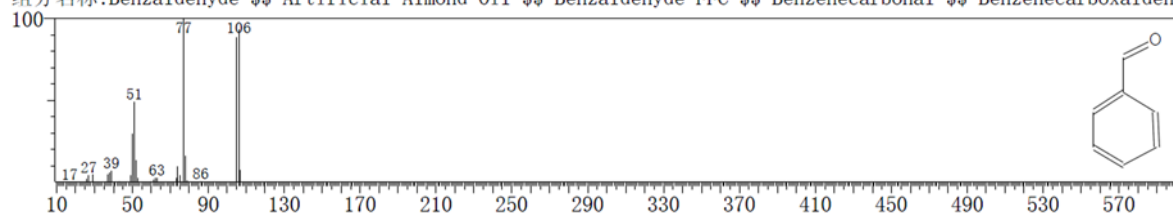

行号#:5 保留时间:3.550(扫描数#:511) 质量峰:357  
原始模式:单个 3.550(511) 基峰:91.05(1992884)  
背景模式:无 组 1 - 事件 1

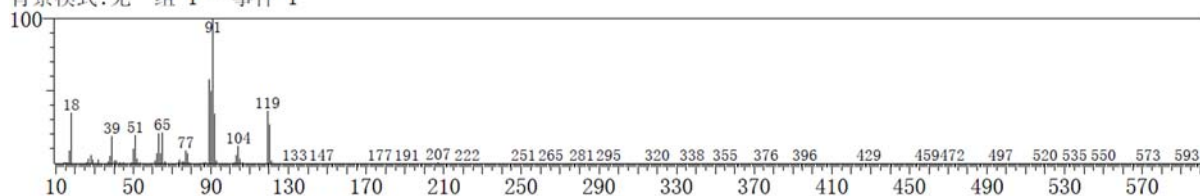

命中#:1 输入:5381 谱库:NIST14.lib  
SI:90 分子式:C8H8O CAS:20780-53-4 摩尔质量:120 保留指数:983  
组分名称:Benzene, (epoxyethyl)-, (R)- \$\$ (R)-(Epoxyethyl)benzene \$\$ R-Phenyloxirane \$\$ (R)-Styrene oxide \$\$

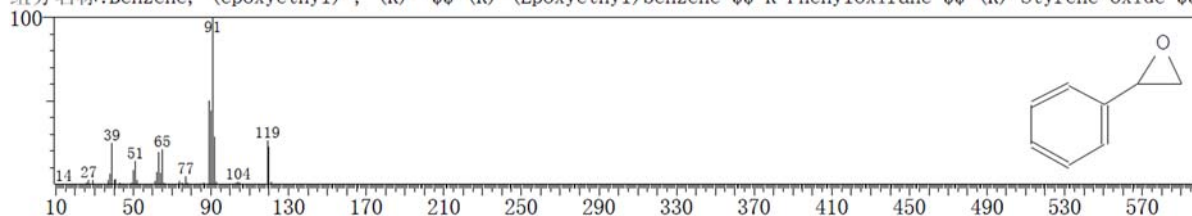

行号#:1 保留时间:3.710(扫描数#:543) 质量峰:423  
 原始模式:单个 3.710(543) 基峰:18.05(637160)  
 背景模式:无 组 1 - 事件 1

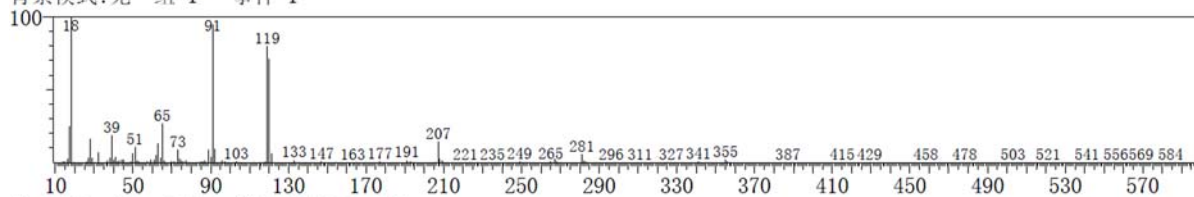

命中#:3 输入:4181 谱库:NIST14s.lib  
 SI:78 分子式:C8H8O CAS:104-87-0 摩尔质量:120 保留指数:1095  
 组分名称:Benzaldehyde, 4-methyl- \$\$ p-Tolualdehyde \$\$ p-Formyltoluene \$\$ p-Methylbenzaldehyde \$\$ p-Toluylal

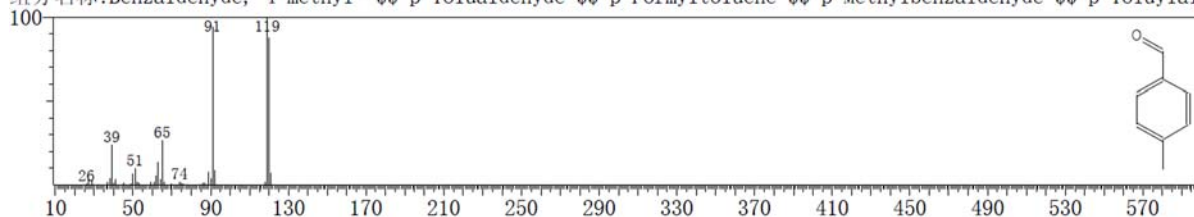

行号#:11 保留时间:5.440(扫描数#:889) 质量峰:400  
 原始模式:单个 5.440(889) 基峰:18.10(531943)  
 背景模式:无 组 1 - 事件 1

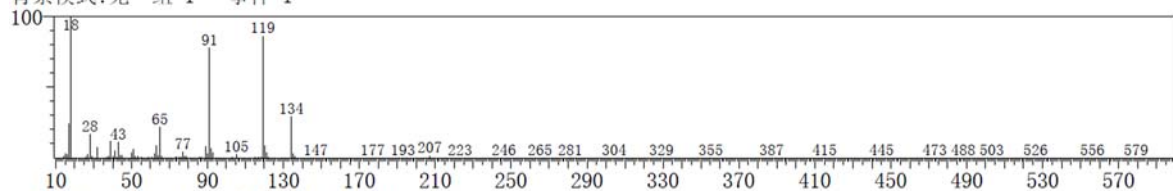

命中#:1 输入:6313 谱库:NIST14s.lib  
 SI:83 分子式:C9H10O CAS:122-00-9 摩尔质量:134 保留指数:1142  
 组分名称:Ethanone, 1-(4-methylphenyl)- \$\$ Acetophenone, 4'-methyl- \$\$ p-Acetyltoluene \$\$ p-Methylacetopheno

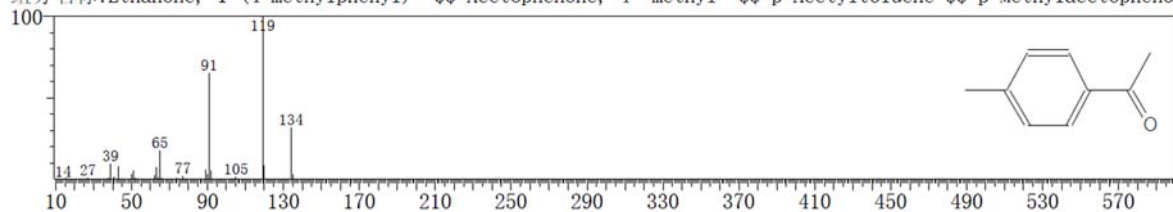

行号#:1 保留时间:4.085(扫描数#:618) 质量峰:434  
 原始模式:单个 4.085(618) 基峰:18.05(604536)  
 背景模式:无 组 1 - 事件 1

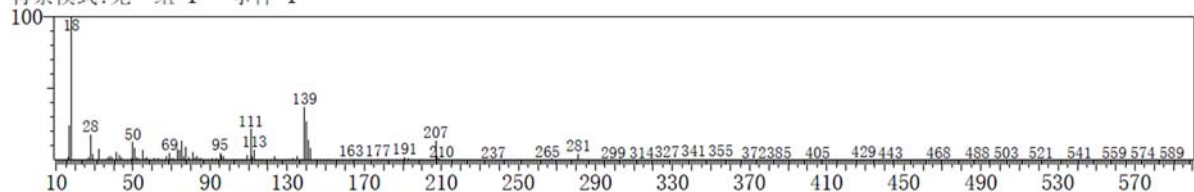

命中#:3 输入:7385 谱库:NIST14s.lib  
 SI:64 分子式:C7H5ClO CAS:104-88-1 摩尔质量:140 保留指数:1162  
 组分名称:Benzaldehyde, 4-chloro- \$\$ Benzaldehyde, p-chloro- \$\$ p-Chlorobenzaldehyde \$\$ 4-Chlorobenzaldehyde

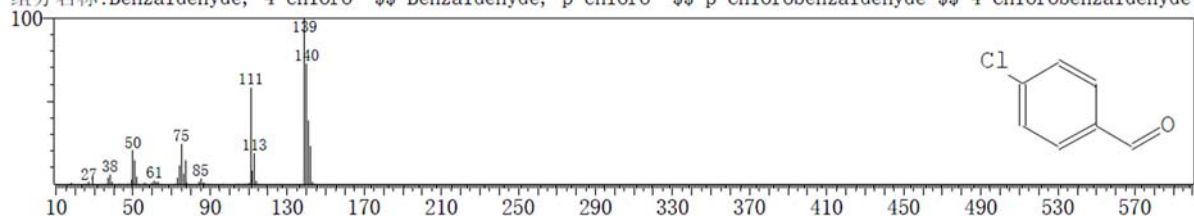



行号#:3 保留时间:5.040(扫描数#:809) 质量峰:439  
 原始模式:单个 5.040(809) 基峰:18.05(560039)  
 背景模式:无 组 1 - 事件 1

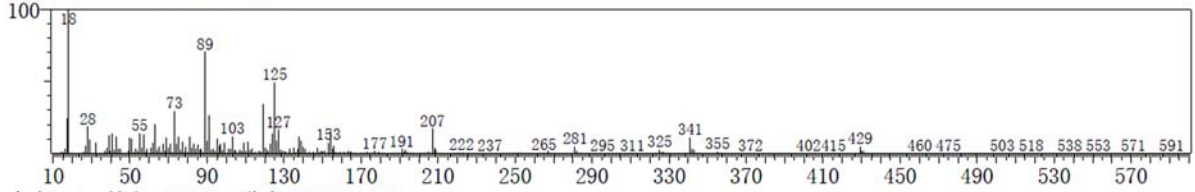

命中#:1 输入:17577 谱库:NIST14.lib  
 SI:63 分子式:C8H7ClO CAS:2788-86-5 摩尔质量:154 保留指数:1163  
 组分名称:Benzen, 1-chloro-4-(epoxyethyl)- \$\$ (p-Chlorophenyl)oxirane \$\$ p-Chlorostyrene oxide \$\$ 4-Chlorostyrene oxide

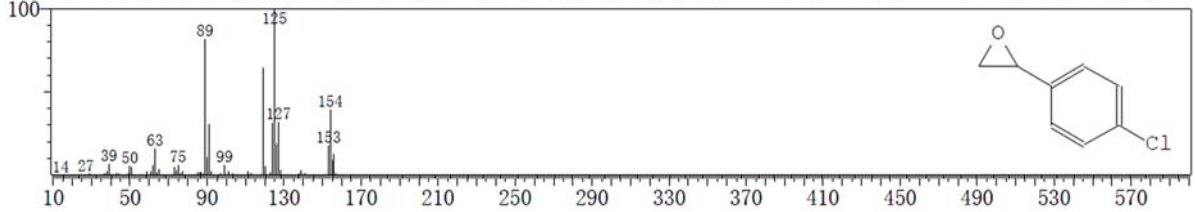

行号#:5 保留时间:2.765(扫描数#:354) 质量峰:388  
 原始模式:单个 2.765(354) 基峰:81.05(3698665)  
 背景模式:无 组 1 - 事件 1

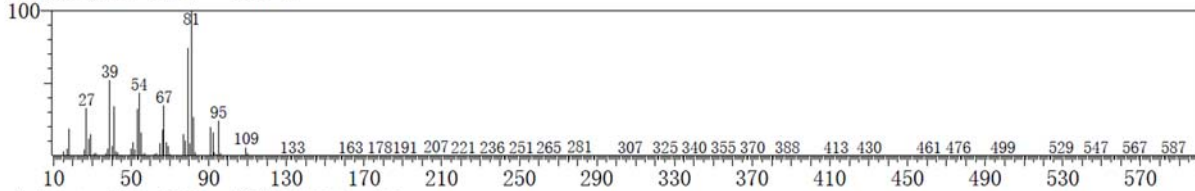

命中#:1 输入:2777 谱库:NIST14s.lib  
 SI:95 分子式:C7H10O CAS:3146-39-2 摩尔质量:110 保留指数:630  
 组分名称:3-Oxatricyclo[3.2.1.0(2,4)]octane, (1.alpha.,2.beta.,4.beta.,5.alpha.)- \$\$ Norbornane, 2,3-epoxy-

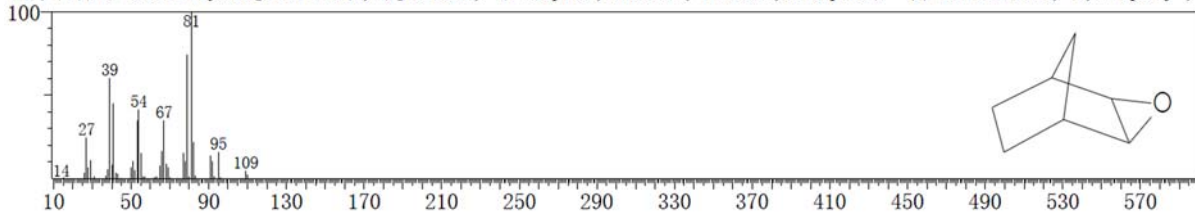

行号#:5 保留时间:6.220(扫描数#:1045) 质量峰:412  
 原始模式:单个 6.220(1045) 基峰:41.05(3200828)  
 背景模式:无 组 1 - 事件 1

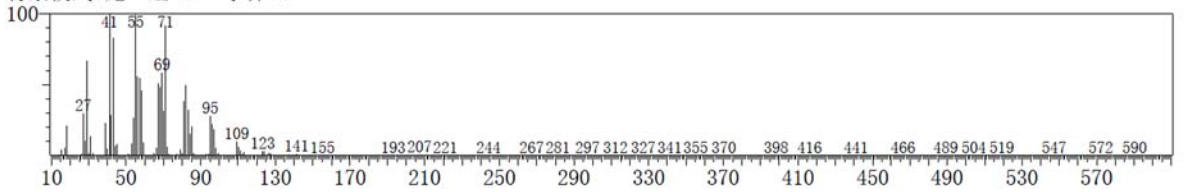

命中#:2 输入:36010 谱库:NIST14.lib  
 SI:94 分子式:C12H24O CAS:2855-19-8 摩尔质量:184 保留指数:1304  
 组分名称:Oxirane, decyl- \$\$ Dodecane, 1,2-epoxy- \$\$ Nedox 1200 \$\$ 1-Dodecene oxide \$\$ 1,2-Dodecene oxide

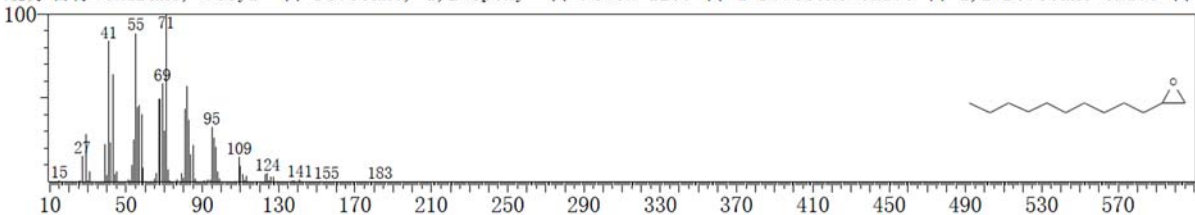

行号#:4 保留时间:2.040(扫描数#:209) 质量峰:381  
 原始模式:单个 2.040(209) 基峰:18.10(1013583)  
 背景模式:无 组 1 - 事件 1

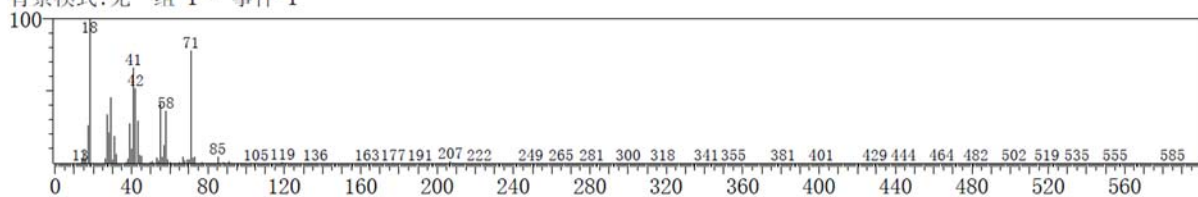

命中#:1 输入:2092 谱库:NIST14.lib  
 SI:89 分子式:C6H12O CAS:1436-34-6 摩尔质量:100 保留指数:708  
 组分名称:Oxirane, butyl- \$\$ Hexane, 1,2-epoxy- \$\$ Butyloxirane \$\$ 1-Hexene epoxide \$\$ 1-Hexene oxide \$\$ 1,2-

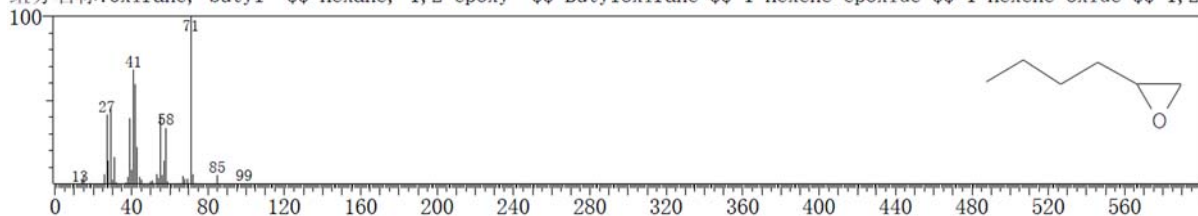

<< 目标组分 >>  
 行号#:3 保留时间:4.390(扫描数#:268) 质量峰:459  
 原始模式:单个 4.390(268) 基峰:70.95(1001094)  
 背景模式:无 组 1 - 事件 1

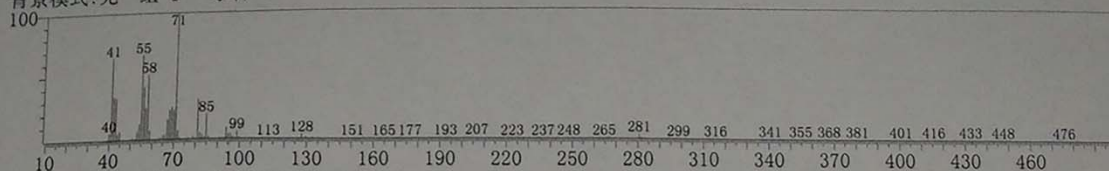

命中#:1 输入:5069 谱库:NIST08s.LIB  
 SI:96 分子式:C8H16O CAS:2984-50-1 摩尔质量:128 保留指数:907  
 组分名称:Oxirane, hexyl- \$\$ Octane, 1,2-epoxy- \$\$ .alpha.-Epoxyoctane \$\$ n-Octene-1,2-oxide \$\$ Hexyloxirane

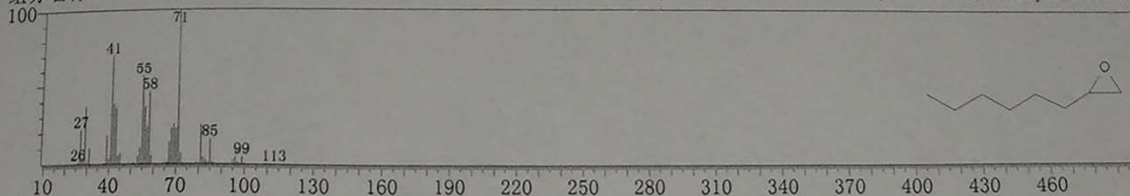

命中#:2 输入:5070 谱库:NIST08s.LIB  
 SI:95 分子式:C8H16O CAS:2984-50-1 摩尔质量:128 保留指数:907  
 组分名称:Oxirane, hexyl- \$\$ Octane, 1,2-epoxy- \$\$ .alpha.-Epoxyoctane \$\$ n-Octene-1,2-oxide \$\$ Hexyloxirane

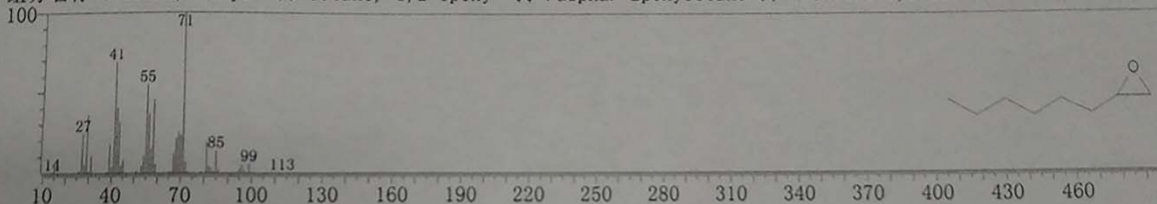

<< 目标组分 >>

行号#:6 保留时间:5.735(扫描数#:748) 质量峰:429  
原始模式:单个 5.735(748) 基峰:55.00(851582)  
背景模式:无 组 1 - 事件 1

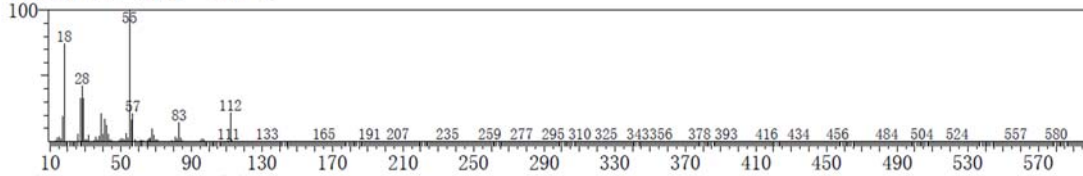

命中#:1 输入:3492 谱库:NIST14.lib  
SI:89 分子式:C6H8O2 CAS:6705-49-3 摩尔质量:112 保留指数:902  
组分名称:7-Oxabicyclo[4.1.0]heptan-2-one \$\$ Cyclohexanone, 2,3-epoxy- \$\$ 2,3-Epoxy cyclohexanone \$\$

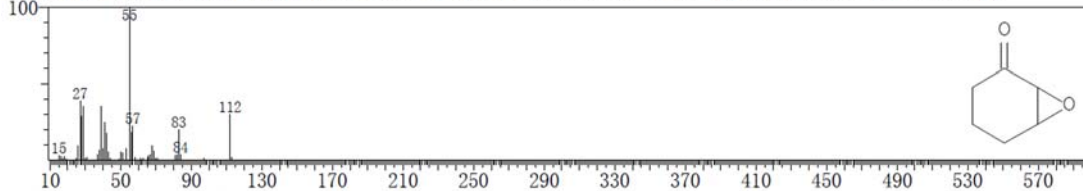

<< 目标组分 >>

行号#:2 保留时间:4.105(扫描数#:322) 质量峰:432  
原始模式:单个 4.105(322) 基峰:97.05(7758143)  
背景模式:无 组 1 - 事件 1

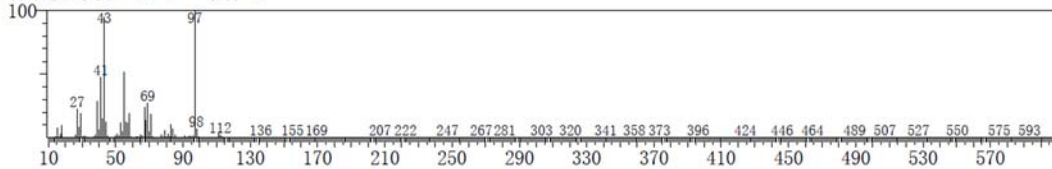

命中#:1 输入:3616 谱库:NIST14.lib  
SI:90 分子式:C7H12O CAS:1713-33-3 摩尔质量:112 保留指数:804  
组分名称:7-Oxabicyclo[4.1.0]heptane, 1-methyl- \$\$ 1-Methyl-1,2-cyclohexene oxide \$\$ 1-Methylcyclohexene epo:

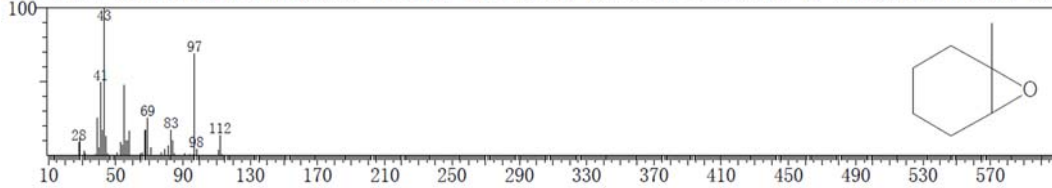

<< 目标组分 >>

行号#:7 保留时间:5.765(扫描数#:754) 质量峰:438  
原始模式:单个 5.765(754) 基峰:57.00(6969066)  
背景模式:无 组 1 - 事件 1

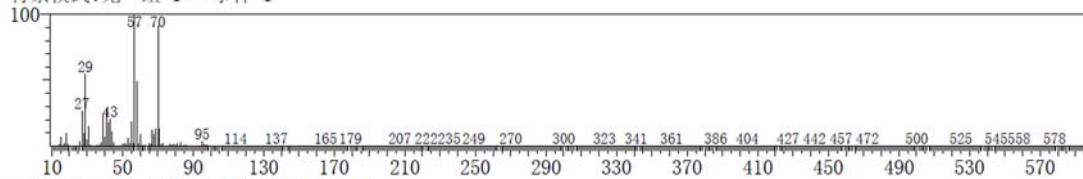

命中#:1 输入:4090 谱库:NIST14.lib  
SI:90 分子式:C6H10O2 CAS:1192-78-5 摩尔质量:114 保留指数:919  
组分名称:7-Oxabicyclo[4.1.0]heptan-2-ol

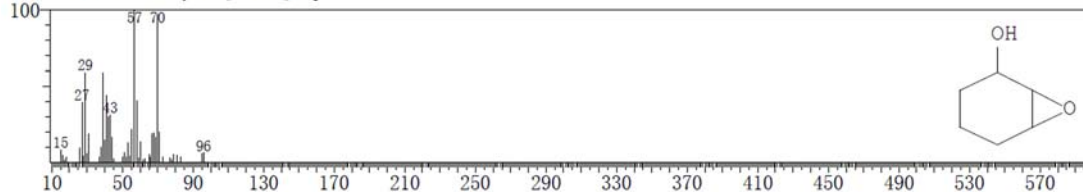

<< 目标组分 >>

行号#:1 保留时间:3.575(扫描数#:216) 质量峰:427  
原始模式:单个 3.575(216) 基峰:43.00(4556396)  
背景模式:无 组 1 - 事件 1

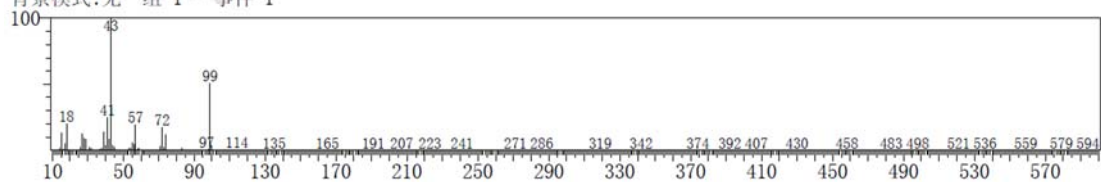

SI:84 分子式:C6H10O2 CAS:4478-63-1 摩尔质量:114 保留指数:780  
组分名称:Ethanone, 1-(3,3-dimethyloxiranyl)- \$\$\$ 2-Pentanone, 3,4-epoxy-4-methyl- \$\$\$ 3-Acetyl-2,2-dimethyl-

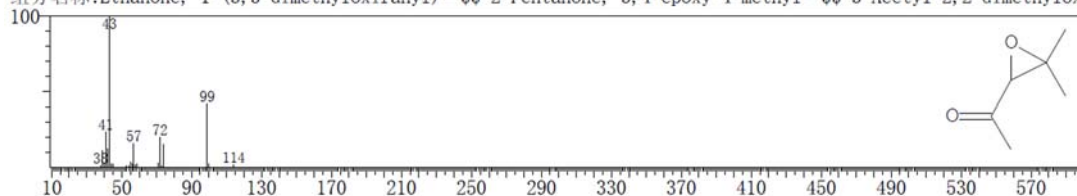

谱库

<< 目标组分 >>

行号#:1 保留时间:2.165(扫描数#:34) 质量峰:406  
原始模式:单个 2.165(34) 基峰:57.95(8411490)  
背景模式:无 组 1 - 事件 1

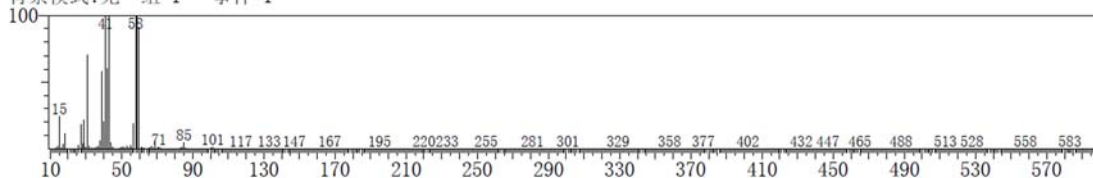

SI:83 分子式:C6H12O CAS:5076-20-0 摩尔质量:100 保留指数:618  
组分名称:Oxirane, tetramethyl- \$\$\$ Tetramethylethylene oxide \$\$\$ Butane, 2,3-epoxy-2,3-dimethyl- \$\$\$ Tetrameth-

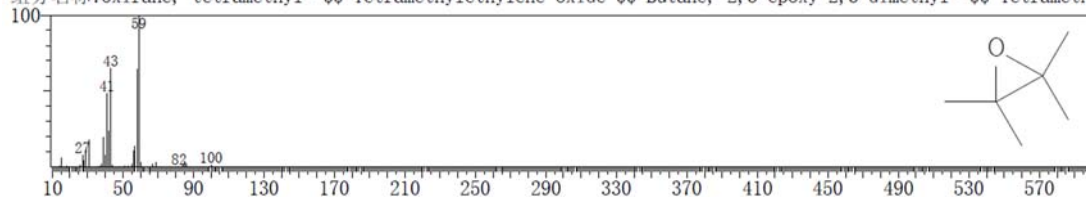

Supplement: c6gc02186g1.pdf [file c6gc02186g1.pdf]
